# Supplementary material for: Revision and Extension of a Generally Applicable Group-Additivity Method for the Calculation of the Refractivity and Polarizability of Organic Molecules
Source: Preprints.org preprint supplement (doi:10.20944/preprints202208.0543.v1), 2022-08-31
Supplement: Supplementary file 1 [file S05. Experimental vs. Calculated Refractivities of Ionic Liquids.doc]

| **Molecule name** | **Refractivity exp** | **Refractivity calc** | **Deviation** | **Dev. in %** |
| --- | --- | --- | --- | --- |
| 1-(2-Cyanoethyl)-3-(2-hydroxyethyl)-imidazolium chloride | 51.06 | 50.40 | 0.66 | 1.29 |
| 1-(2-Cyanoethyl)-3-(2-propen-1-yl)-imidazolium chloride | 53.46 | 53.31 | 0.15 | 0.28 |
| 1-(2-Cyanoethyl)-3-octylimidazolium 3-sulfobenzoate | 111.59 | 112.27 | -0.68 | -0.61 |
| 1-(2-Hydroxyethyl)-3-methylimidazolium perfluoropentanoate | 62.30 | 61.37 | 0.93 | 1.49 |
| 1-(3-Cyanopropyl)-3-methylimidazolium bis(trifluoromethylsulfonyl) amide | 74.64 | 74.84 | -0.20 | -0.27 |
| 1-(3-Cyanopropyl)-3-methylimidazolium dicyanamide | 56.96 | 57.40 | -0.44 | -0.77 |
| 1-(3-Cyanopropyl)-3-methylimidazolium tetrafluoroborate | 46.88 | 47.62 | -0.74 | -1.58 |
| 1-(3-Cyanopropyl)-pyridinium bis(trifluoromethylsulfonyl) amide | 75.74 | 76.04 | -0.30 | -0.40 |
| 1-(3-Cyanopropyl)-pyridinium dicyanamide | 57.75 | 58.60 | -0.85 | -1.47 |
| 1,1,3,3-Tetramethylguanidinium butanoate | 56.23 | 56.13 | 0.10 | 0.18 |
| 1,1,3,3-Tetramethylguanidinium heptanoate | 70.63 | 70.02 | 0.61 | 0.86 |
| 1,1,3,3-Tetramethylguanidinium hexanoate | 64.74 | 65.39 | -0.65 | -1.00 |
| 1,1,3,3-Tetramethylguanidinium octanoate | 74.36 | 74.65 | -0.29 | -0.39 |
| 1,1,3,3-Tetramethylguanidinium pentanoate | 60.85 | 60.76 | 0.09 | 0.15 |
| 1,2-Diethylpyridinium ethylsulfate | 64.48 | 64.43 | 0.05 | 0.08 |
| 1,3-Diethylimidazolium bis(trifluoromethylsulfonyl) amide | 70.29 | 70.38 | -0.09 | -0.13 |
| 1,3-Dimethylimidazolium bis(trifluoromethylsulfonyl) amide | 60.56 | 61.20 | -0.64 | -1.06 |
| 1,3-Dimethylimidazolium methosulfate | 44.78 | 44.80 | -0.02 | -0.04 |
| 1,3-Dipropylimidazolium bis(trifluoromethylsulfonyl) amide | 79.71 | 79.64 | 0.07 | 0.09 |
| 1-Benzyl-3-methylimidazolium bis(trifluoromethylsulfonyl) amide | 85.86 | 85.72 | 0.14 | 0.16 |
| 1-Butyl-1-methylpiperidinium bis(trifluoromethylsulfonyl)amide | 81.48 | 81.50 | -0.02 | -0.02 |
| 1-Butyl-1-methylpyrrolidinium 2-acryloamido-2-methylpropanesulfonate | 91.47 | 90.77 | 0.70 | 0.77 |
| 1-Butyl-1-methylpyrrolidinium acetate | 55.00 | 55.73 | -0.73 | -1.33 |
| 1-Butyl-1-methylpyrrolidinium bis(trifluoromethylsulfonyl)amide | 76.89 | 76.87 | 0.02 | 0.03 |
| 1-Butyl-1-methylpyrrolidinium dicyanamide | 60.12 | 59.43 | 0.69 | 1.15 |
| 1-Butyl-1-methylpyrrolidinium methylsulfate | 60.93 | 60.47 | 0.46 | 0.75 |
| 1-Butyl-1-methylpyrrolidinium trifluoromethanesulfonate | 60.44 | 60.06 | 0.38 | 0.63 |
| 1-Butyl-2,3-dimethylimidazolium bis(trifluoromethanesulfonyl) amide | 79.33 | 79.39 | -0.06 | -0.08 |
| 1-Butyl-2,3-dimethylimidazolium tetrafluoroborate | 52.38 | 52.17 | 0.21 | 0.40 |
| 1-Butyl-2-methylpyridinium tetrafluoroborate | 53.45 | 53.58 | -0.13 | -0.24 |
| 1-Butyl-3-(2-cyanoethyl)-imidazolium chloride | 57.93 | 58.25 | -0.32 | -0.55 |
| 1-Butyl-3-(2-cyanoethyl)imidazolium thiocyanate | 67.06 | 67.10 | -0.04 | -0.06 |
| 1-Butyl-3-ethylimidazolium bis(trifluoromethylsulfonyl) amide | 79.44 | 79.64 | -0.20 | -0.25 |
| 1-Butyl-3-ethylimidazolium triflate | 63.01 | 62.83 | 0.18 | 0.29 |
| 1-Butyl-3-methylimidazolium 2-acryloamido-2-methylpropanesulfonate | 88.52 | 88.95 | -0.43 | -0.49 |
| 1-Butyl-3-methylimidazolium acetate | 54.18 | 53.91 | 0.27 | 0.50 |
| 1-Butyl-3-methylimidazolium bis(perfluorobutanesulfonyl) amide | 105.39 | 105.45 | -0.06 | -0.06 |
| 1-Butyl-3-methylimidazolium bis(trifluoromethanesulfonyl) amide | 74.99 | 75.05 | -0.06 | -0.08 |
| 1-Butyl-3-methylimidazolium dicyanoamide | 57.80 | 57.61 | 0.19 | 0.33 |
| 1-Butyl-3-methylimidazolium glycine | 58.39 | 57.34 | 1.05 | 1.80 |
| 1-Butyl-3-methylimidazolium hexafluorophosphate | 51.46 | 51.56 | -0.10 | -0.19 |
| 1-Butyl-3-methylimidazolium methosulfate | 58.58 | 58.65 | -0.07 | -0.12 |
| 1-Butyl-3-methylimidazolium octylsulfate | 91.49 | 91.09 | 0.40 | 0.44 |
| 1-Butyl-3-methylimidazolium perfluorobutylsulfonate | 73.34 | 73.44 | -0.10 | -0.14 |
| 1-Butyl-3-methylimidazolium tetracyanoborate | 67.83 | 67.87 | -0.04 | -0.06 |
| 1-Butyl-3-methylimidazolium tetrafluoroborate | 47.81 | 47.83 | -0.02 | -0.04 |
| 1-Butyl-3-methylimidazolium thiocyanate | 57.79 | 58.09 | -0.30 | -0.52 |
| 1-Butyl-3-methylimidazolium threoninate | 68.48 | 67.95 | 0.53 | 0.77 |
| 1-Butyl-3-methylimidazolium tricyanomethanide | 65.33 | 65.39 | -0.06 | -0.09 |
| 1-Butyl-3-methylimidazolium trifluoromethylsulfonate | 57.91 | 58.24 | -0.33 | -0.57 |
| 1-Butyl-4-methylpyridinium tetrafluoroborate | 54.00 | 53.84 | 0.16 | 0.30 |
| 1-Butylpyridinium 2-acryloamido-2-methylpropanesulfonate | 91.01 | 90.15 | 0.86 | 0.94 |
| 1-Butylpyridinium bis(fluorosulfonyl) amide | 64.60 | 64.65 | -0.05 | -0.08 |
| 1-Butylpyridinium dicyanamide | 58.87 | 58.81 | 0.06 | 0.10 |
| 1-Butylpyridinium tetrafluoroborate | 48.99 | 49.03 | -0.04 | -0.08 |
| 1-Butyltetrahydrothiophenium dicyanamide | 59.59 | 59.81 | -0.22 | -0.37 |
| 1-Decyl-3-methylimidazolium bis(trifluoromethanesulfonyl) amide | 102.90 | 102.83 | 0.07 | 0.07 |
| 1-Decyl-3-methylimidazolium tetracyanoborate | 95.66 | 95.65 | 0.01 | 0.01 |
| 1-Decyl-3-methylimidazolium tricyanomethanide | 93.23 | 93.17 | 0.06 | 0.06 |
| 1-Dodecyl-3-methylimidazolium bis(trifluoromethanesulfonyl) amide | 112.08 | 112.09 | -0.01 | -0.01 |
| 1-Ethyl-2,3-dimethylimidazolium bis(trifluoromethanesulfonyl) amide | 69.94 | 70.13 | -0.19 | -0.27 |
| 1-Ethyl-3-methylimidazolium 1,1,2,2-tetrafluoroethanesulfonate | 53.91 | 53.77 | 0.14 | 0.26 |
| 1-Ethyl-3-methylimidazolium acetate | 44.95 | 44.65 | 0.30 | 0.67 |
| 1-Ethyl-3-methylimidazolium aminoacetate | 47.68 | 48.08 | -0.40 | -0.84 |
| 1-Ethyl-3-methylimidazolium bis(trifluoromethanesulfonyl) amide | 65.77 | 65.79 | -0.02 | -0.03 |
| 1-Ethyl-3-methylimidazolium dicyanamide | 48.35 | 48.35 | 0.00 | 0.00 |
| 1-Ethyl-3-methylimidazolium diethylphosphate | 64.56 | 64.35 | 0.21 | 0.33 |
| 1-Ethyl-3-methylimidazolium dimethylphosphate | 55.17 | 55.03 | 0.14 | 0.25 |
| 1-Ethyl-3-methylimidazolium ethosulfate | 54.16 | 54.05 | 0.11 | 0.20 |
| 1-Ethyl-3-methylimidazolium imidodisulfurylfluoride | 54.05 | 54.19 | -0.14 | -0.26 |
| 1-Ethyl-3-methylimidazolium L-alanine | 52.10 | 52.64 | -0.54 | -1.04 |
| 1-Ethyl-3-methylimidazolium L-proline | 58.84 | 59.70 | -0.86 | -1.46 |
| 1-Ethyl-3-methylimidazolium L-serine | 54.05 | 54.05 | 0.00 | 0.00 |
| 1-Ethyl-3-methylimidazolium methanesulfonate | 48.45 | 48.69 | -0.24 | -0.50 |
| 1-Ethyl-3-methylimidazolium methylsulfate | 48.62 | 49.39 | -0.77 | -1.58 |
| 1-Ethyl-3-methylimidazolium taurinate | 56.41 | 56.96 | -0.55 | -0.98 |
| 1-Ethyl-3-methylimidazolium tetracyanoborate | 58.77 | 58.61 | 0.16 | 0.27 |
| 1-Ethyl-3-methylimidazolium tetrafluoroborate | 38.70 | 38.57 | 0.13 | 0.34 |
| 1-Ethyl-3-methylimidazolium thiocyanate | 48.31 | 48.83 | -0.52 | -1.08 |
| 1-Ethyl-3-methylimidazolium threoninate | 58.86 | 58.69 | 0.17 | 0.29 |
| 1-Ethyl-3-methylimidazolium tricyanomethide | 55.87 | 56.13 | -0.26 | -0.47 |
| 1-Ethyl-3-methylimidazolium trifluoromethylsulfonate | 48.91 | 48.98 | -0.07 | -0.14 |
| 1-Ethyl-3-methylpyridinium bis(fluorosulfonyl) amide | 60.16 | 60.20 | -0.04 | -0.07 |
| 1-Ethyl-3-methylpyridinium ethylsulfate | 60.18 | 60.06 | 0.12 | 0.20 |
| 1-Ethyl-3-propylimidazolium bis(trifluoromethanesulfonyl) amide | 74.95 | 75.01 | -0.06 | -0.08 |
| 1-Ethylmorpholinium tetrafluoroborate | 40.81 | 39.89 | 0.92 | 2.25 |
| 1-Ethylpyridinium bis(fluorosulfonyl) amide | 55.18 | 55.39 | -0.21 | -0.38 |
| 1-Ethylpyridinium ethylsulfate | 55.29 | 55.25 | 0.04 | 0.07 |
| 1-Ethylpyridinium triflate | 50.05 | 50.18 | -0.13 | -0.26 |
| 1-Ethyltetrahydrothiophenium dicyanamide | 50.87 | 50.55 | 0.32 | 0.63 |
| 1-Heptyl-3-methylimidazolium bis(trifluoromethanesulfonyl) amide | 88.14 | 88.94 | -0.80 | -0.91 |
| 1-Heptyl-3-methylimidazolium hexafluorophosphate | 65.44 | 65.45 | -0.01 | -0.02 |
| 1-Hexyl-1-methylpyrrolidinium bis(trifluoromethanesulfonyl) amide | 87.26 | 86.13 | 1.13 | 1.29 |
| 1-Hexyl-3,5-dimethylpyridinium bis(trifluoromethylsulfonyl)amide | 95.56 | 95.13 | 0.43 | 0.45 |
| 1-Hexyl-3-methylimidazolium acetate | 63.54 | 63.17 | 0.37 | 0.58 |
| 1-Hexyl-3-methylimidazolium bis(trifluoromethanesulfonyl) amide | 84.23 | 84.31 | -0.08 | -0.09 |
| 1-Hexyl-3-methylimidazolium chloride | 58.80 | 58.50 | 0.30 | 0.51 |
| 1-Hexyl-3-methylimidazolium dicyanoamide | 67.19 | 66.87 | 0.32 | 0.48 |
| 1-Hexyl-3-methylimidazolium hexafluorophosphate | 60.69 | 60.82 | -0.13 | -0.21 |
| 1-Hexyl-3-methylimidazolium tetracyanoborate | 76.88 | 77.13 | -0.25 | -0.33 |
| 1-Hexyl-3-methylimidazolium tetrafluoroborate | 56.91 | 57.09 | -0.18 | -0.32 |
| 1-Hexyl-3-methylimidazolium thiocyanate | 68.17 | 67.35 | 0.82 | 1.20 |
| 1-Hexyl-3-methylimidazolium tricyanomethanide | 74.67 | 74.65 | 0.02 | 0.03 |
| 1-Hexylpyridinium bis(fluorosulfonyl) amide | 73.94 | 73.91 | 0.03 | 0.04 |
| 1-Isobutyl-1-methylpyrrolidinium bis(trifluoromethylsulfonyl)amide | 77.02 | 76.83 | 0.19 | 0.25 |
| 1-Isobutyl-3-methylimidazolium bis(trifluoromethanesulfonyl) amide | 74.92 | 75.01 | -0.09 | -0.12 |
| 1-Isobutyl-3-methylpyridinium bis(trifluoromethylsulfonyl)amide | 81.23 | 81.02 | 0.21 | 0.26 |
| 1-Methyl-1-(2',3'-epoxypropyl)-2-oxopyrrolidinium chloride | 49.38 | 49.79 | -0.41 | -0.83 |
| 1-Methyl-1-decylpyrrolidinium bis(trifluoromethanesulfonyl) amide | 104.90 | 104.65 | 0.25 | 0.24 |
| 1-Methyl-1-propylpiperidinium bis(trifluoromethylsulfonyl)amide | 76.90 | 76.87 | 0.03 | 0.04 |
| 1-Methyl-1-propylpyrrolidinium bis(fluorosulfonyl) amide | 61.04 | 60.64 | 0.40 | 0.66 |
| 1-Methyl-1-propylpyrrolidinium bis(trifluoromethanesulfonyl) amide | 72.50 | 72.24 | 0.26 | 0.36 |
| 1-Methyl-2-pyrrolidonium tetrafluoroborate | 37.04 | 37.68 | -0.64 | -1.73 |
| 1-Methyl-3-hexylimidazolium threoninate | 77.73 | 77.21 | 0.52 | 0.67 |
| 1-Methyl-3-pentylimidazolium threoninate | 73.07 | 72.58 | 0.49 | 0.67 |
| 1-Methyl-3-propylimidazolium threoninate | 63.75 | 63.32 | 0.43 | 0.67 |
| 1-Methylmorpholinium tetrafluoroborate | 35.90 | 35.57 | 0.33 | 0.92 |
| 1-Methylpiperidinium tetrafluoroborate | 37.84 | 38.51 | -0.67 | -1.77 |
| 1-Methylpyridinium methylsulfate | 46.05 | 46.27 | -0.22 | -0.48 |
| 1-Methylpyrrolidinium tetrafluoroborate | 34.55 | 33.88 | 0.67 | 1.94 |
| 1-Nonyl-3-methylimidazolium bis(trifluoromethanesulfonyl) amide | 98.06 | 98.20 | -0.14 | -0.14 |
| 1-Nonyl-3-methylimidazolium hexafluorophosphate | 74.74 | 74.71 | 0.03 | 0.04 |
| 1-Octyl-3-methylimidazolium bis(trifluoromethanesulfonyl) amide | 93.61 | 93.57 | 0.04 | 0.04 |
| 1-Octyl-3-methylimidazolium chloride | 67.80 | 67.76 | 0.04 | 0.06 |
| 1-Octyl-3-methylimidazolium hexafluorophosphate | 70.30 | 70.08 | 0.22 | 0.31 |
| 1-Octyl-3-methylimidazolium tetracyanoborate | 86.41 | 86.39 | 0.02 | 0.02 |
| 1-Octyl-3-methylimidazolium tetrafluoroborate | 66.24 | 66.35 | -0.11 | -0.17 |
| 1-Octyl-3-methylimidazolium tricyanomethanide | 84.09 | 83.91 | 0.18 | 0.21 |
| 1-Octyl-3-methylpyridinium tetrafluoroborate | 72.74 | 72.36 | 0.38 | 0.52 |
| 1-Octylpyridinium bis(trifluoromethylsulfonyl)amide | 95.19 | 94.77 | 0.42 | 0.44 |
| 1-Pentyl-3-methylimidazolium acetate | 59.01 | 58.54 | 0.47 | 0.80 |
| 1-Pentyl-3-methylimidazolium bis(trifluoromethanesulfonyl) amide | 79.57 | 79.68 | -0.11 | -0.14 |
| 1-Pentyl-3-methylimidazolium hexafluorophosphate | 56.11 | 56.19 | -0.08 | -0.14 |
| 1-Pentyl-3-methylimidazolium tetrafluoroborate | 52.25 | 52.46 | -0.21 | -0.40 |
| 1-Pentylpyridinium dicyanamide | 63.44 | 63.44 | 0.00 | 0.00 |
| 1-Phenyl-2,3,5-trimethylpyrazolium methylsulfonate | 68.77 | 69.35 | -0.58 | -0.84 |
| 1-Phenyl-2-butyl-3,5-dimethylpyrazolium methylsulfonate | 82.67 | 82.93 | -0.26 | -0.31 |
| 1-Phenyl-2-heptyl-3,5-dimethylpyrazolium methylsulfonate | 97.61 | 96.82 | 0.79 | 0.81 |
| 1-Phenyl-2-hexyl-3,5-dimethylpyrazolium methylsulfonate | 92.64 | 92.19 | 0.45 | 0.49 |
| 1-Phenyl-2-pentyl-3,5-dimethylpyrazolium methylsulfonate | 87.17 | 87.56 | -0.39 | -0.45 |
| 1-Propyl-3-methylimidazolium acetate | 49.37 | 49.28 | 0.09 | 0.18 |
| 1-Propyl-3-methylimidazolium bis(trifluoromethanesulfonyl) amide | 70.48 | 70.42 | 0.06 | 0.09 |
| 1-Propyl-3-methylimidazolium tetrafluoroborate | 43.09 | 43.20 | -0.11 | -0.26 |
| 1-Propylpyridinium dicyanamide | 54.24 | 54.18 | 0.06 | 0.11 |
| 1-Propylpyridinium tetrafluoroborate | 44.35 | 44.40 | -0.05 | -0.11 |
| 1-Propyronitrile-3-butylimidazolium bromide | 62.60 | 62.36 | 0.24 | 0.38 |
| 1-Propyronitrile-3-hexylimidazolium bromide | 71.74 | 71.62 | 0.12 | 0.17 |
| 1-Propyronitrile-3-octylimidazolium bromide | 80.51 | 80.88 | -0.37 | -0.46 |
| 2-Hydroxyethylammonium acetate | 29.31 | 28.99 | 0.32 | 1.09 |
| 2-hydroxyethylammonium butanoate | 38.53 | 38.25 | 0.28 | 0.73 |
| 2-Hydroxyethylammonium formate | 24.85 | 24.70 | 0.15 | 0.60 |
| 2-Hydroxyethylammonium hexanoate | 47.80 | 47.51 | 0.29 | 0.61 |
| 2-Hydroxyethylammonium lactate | 34.69 | 35.04 | -0.35 | -1.01 |
| 2-Hydroxyethylammonium pentanoate | 43.12 | 42.88 | 0.24 | 0.56 |
| 2-Hydroxyethylammonium propionate | 33.29 | 33.62 | -0.33 | -0.99 |
| 3-Methyl-1-propylpyridinium bis(trifluoromethylsulfonyl)amide | 76.40 | 76.43 | -0.03 | -0.04 |
| Bis(2-hydroxyethyl)ammonium hexanoate | 58.49 | 58.34 | 0.15 | 0.26 |
| Butylammonium nitrate | 33.34 | 33.37 | -0.03 | -0.09 |
| Dimethyl butyl isopropylammonium bis(trifluoromethylsulfonyl)amide | 78.81 | 79.06 | -0.25 | -0.32 |
| Dimethyl hexyl isopropylammonium bis(trifluoromethylsulfonyl)amide | 89.14 | 88.32 | 0.82 | 0.92 |
| Dimethylpropylisopropylammonium bis(trifluoromethylsulfonyl)amide | 73.56 | 74.43 | -0.87 | -1.18 |
| Ethylammonium nitrate | 24.14 | 24.11 | 0.03 | 0.12 |
| L-Alanine 1-methylethyl ester dodecyl sulfate | 102.88 | 103.30 | -0.42 | -0.41 |
| L-Alanine 2-methylpropyl ester dodecyl sulfate | 107.40 | 107.88 | -0.48 | -0.45 |
| L-Proline 1-methylethyl ester dodecyl sulfate | 110.32 | 110.58 | -0.26 | -0.24 |
| L-Valine 1-methylethyl ester dodecyl sulfate | 112.65 | 112.52 | 0.13 | 0.12 |
| Morpholinium formate | 32.20 | 32.26 | -0.06 | -0.19 |
| N-(2',3'-Epoxypropyl)-N-methylpyrrolidonium acetate | 55.50 | 54.46 | 1.04 | 1.87 |
| N-Butyl-3-methylpyridinium bis(trifluoromethylsulfonyl)amide | 80.49 | 81.06 | -0.57 | -0.71 |
| N-Butyl-3-methylpyridinium trifluoromethanesulfonate | 64.26 | 64.25 | 0.01 | 0.02 |
| N-Butyl-4-methylthiazolium bis(trifluoromethylsulfonyl) amide | 78.68 | 79.25 | -0.57 | -0.72 |
| N-Butyl-4-methylthiazolium difluoro(oxalato)borate | 63.24 | 63.32 | -0.08 | -0.13 |
| N-Butyl-N-methylmorpholinium N-acetylalaninate | 74.32 | 74.63 | -0.31 | -0.42 |
| N-Butyl-N-methylmorpholinium N-acetylleucinate | 88.43 | 88.48 | -0.05 | -0.06 |
| N-Butyl-N-methylmorpholinium N-acetylvalinate | 83.98 | 83.85 | 0.13 | 0.15 |
| N-Butylpyridinium bis(trifluoromethanesulfonyl) amide | 76.22 | 76.25 | -0.03 | -0.04 |
| N-Butylpyridinium triflate | 59.25 | 59.44 | -0.19 | -0.32 |
| N-Butylpyridinium trifluoroacetate | 54.87 | 55.39 | -0.52 | -0.95 |
| N-Butylthiazolium bis(trifluoromethylsulfonyl) amide | 73.89 | 74.63 | -0.74 | -1.00 |
| N-Butylthiazolium difluoro(oxalato)borate | 58.43 | 58.70 | -0.27 | -0.46 |
| N-Decylpyridinium bis(trifluoromethanesulfonyl) amide | 104.52 | 104.03 | 0.49 | 0.47 |
| N-Dodecylpyridinium bis(trifluoromethanesulfonyl) amide | 113.68 | 113.29 | 0.39 | 0.34 |
| N-Ethyl-2-methylpyridinium bis(trifluoromethylsulfonyl)amide | 71.54 | 71.54 | 0.00 | 0.00 |
| N-Ethylmorpholinium formate | 41.07 | 41.68 | -0.61 | -1.49 |
| N-Ethyl-N-methylmorpholinium N-acetylalaninate | 65.23 | 65.37 | -0.14 | -0.21 |
| N-Ethyl-N-methylmorpholinium N-acetylisoleucinate | 78.62 | 79.22 | -0.60 | -0.76 |
| N-Ethyl-N-methylmorpholinium N-acetylleucinate | 78.65 | 79.22 | -0.57 | -0.72 |
| N-Ethyl-N-methylmorpholinium N-acetylvalinate | 74.01 | 74.59 | -0.58 | -0.78 |
| N-Hexyl-N-methylmorpholinium N-acetylalaninate | 83.42 | 83.89 | -0.47 | -0.56 |
| N-Hexyl-N-methylmorpholinium N-acetylleucinate | 97.24 | 97.74 | -0.50 | -0.51 |
| N-Hexyl-N-methylmorpholinium N-acetylvalinate | 92.26 | 93.11 | -0.85 | -0.92 |
| N-Isobutyl-3-sulfopropan-1-aminium hydrogen sulfate | 62.85 | 62.71 | 0.14 | 0.22 |
| N-Methyl-N-(2,3-dihydroxypropyl)pyrrolidinium bis(trifluoromethanesulfonyl) amide | 74.88 | 75.07 | -0.19 | -0.25 |
| N-Octyl-N-methylmorpholinium N-acetylalaninate | 92.82 | 93.15 | -0.33 | -0.36 |
| N-Octyl-N-methylmorpholinium N-acetylvalinate | 102.12 | 102.37 | -0.25 | -0.24 |
| N-Propyl-2-methylpyridinium bis(trifluoromethylsulfonyl)amide | 76.28 | 76.17 | 0.11 | 0.14 |
| N-Propyl-N-methylmorpholinium N-acetylalaninate | 69.57 | 70.00 | -0.43 | -0.62 |
| N-Propyl-N-methylmorpholinium N-acetylleucinate | 83.88 | 83.85 | 0.03 | 0.04 |
| N-Propyl-N-methylmorpholinium N-acetylvalinate | 79.02 | 79.22 | -0.20 | -0.25 |
| Propylammonium nitrate | 28.78 | 28.74 | 0.04 | 0.14 |
| S-Butyl-dimethylthioformamidium bis(trifluoromethylsulfonyl) amide | 79.26 | 79.02 | 0.24 | 0.30 |
| S-Butyl-dimethylthioformamidium difluorooxalylborate | 63.42 | 63.09 | 0.33 | 0.52 |
| S-Ethyl-dimethylthioformamidium bis(trifluoromethylsulfonyl) amide | 69.84 | 69.76 | 0.08 | 0.11 |
| S-Ethyl-dimethylthioformamidium difluorooxalylborate | 53.86 | 53.83 | 0.03 | 0.06 |
| S-Ethyl-dimethylthioformamidium trifluoromethylsulfonate | 53.62 | 52.95 | 0.67 | 1.25 |
| S-Methyl-dimethylthioformamidium bis(trifluoromethylsulfonyl) amide | 64.95 | 64.92 | 0.03 | 0.05 |
| S-Methyl-dimethylthioformamidium trifluoromethylsulfonate | 48.32 | 48.11 | 0.21 | 0.43 |
| Tetrabutylphosphonium acetate | 97.22 | 97.33 | -0.11 | -0.11 |
| Tetrabutylphosphonium formate | 93.57 | 93.04 | 0.53 | 0.57 |
| Tetrabutylphosphonium propanoate | 102.16 | 101.96 | 0.20 | 0.20 |
| Tetradecyl trihexylphosphonium bis(trifluoromethylsulfonyl)amide | 192.57 | 192.55 | 0.02 | 0.01 |
| Tetradecyl trihexylphosphonium chloride | 166.32 | 166.74 | -0.42 | -0.25 |
| Tributylmethylammonium bis(trifluoromethylsulfonyl)amide | 97.59 | 97.53 | 0.06 | 0.06 |
| Triethylammonium acetate | 46.76 | 46.42 | 0.34 | 0.73 |
| Triethyldecylammonium bis(trifluoromethylsulfonyl) amide | 111.38 | 111.11 | 0.27 | 0.24 |
| Triethyldodecylammonium bis(trifluoromethylsulfonyl) amide | 120.72 | 120.37 | 0.35 | 0.29 |
| Triethylheptylammonium bis(trifluoromethylsulfonyl) amide | 97.05 | 97.22 | -0.17 | -0.18 |
| Triethylhexylammonium bis(trifluoromethylsulfonyl) amide | 92.72 | 92.59 | 0.13 | 0.14 |
| Triethyloctylammonium bis(trifluoromethylsulfonyl) amide | 101.96 | 101.85 | 0.11 | 0.11 |
| Triethylsulfonium bis(trifluoromethylsulfonyl) amide | 70.04 | 70.13 | -0.09 | -0.13 |
| Triethyltetradecylammonium bis(trifluoromethylsulfonyl) amide | 129.84 | 129.63 | 0.21 | 0.16 |
| Trihexyl tetradecyl phosphonium dicyanamide | 174.84 | 175.11 | -0.27 | -0.15 |
| Trihexyl tetradecyl phosphonium trifluoromethylsulfonate | 175.69 | 175.74 | -0.05 | -0.03 |
| Trimethyl butylammonium bis(trifluoromethylsulfonyl)amide | 70.29 | 70.37 | -0.08 | -0.11 |
| Trimethyl hexylammonium bis(trifluoromethylsulfonyl)amide | 79.64 | 79.63 | 0.01 | 0.01 |
| Trimethyl octylammonium bis(trifluoromethylsulfonyl)amide | 88.97 | 88.89 | 0.08 | 0.09 |
| Trimethyl pentylammonium bis(trifluoromethylsulfonyl)amide | 75.01 | 75.00 | 0.01 | 0.01 |
| Trimethyl propylammonium bis(trifluoromethylsulfonyl)amide | 65.65 | 65.74 | -0.09 | -0.14 |
