# Supplementary material for: Revision and Extension of a Generally Applicable Group-Additivity Method for the Calculation of the Refractivity and Polarizability of Organic Molecules
Source: Preprints.org preprint supplement (doi:10.20944/preprints202208.0543.v1), 2022-08-31
Supplement: Supplementary file 2 [file S06. Experimental vs. Calculated Refractivities of Silicon Compounds.doc]

| **Molecule name** | **Refractivity exp** | **Refractivity calc** | **Deviation** | **Dev. in %** |
| --- | --- | --- | --- | --- |
| (2-Phenylethyl)trichlorosilane | 58.62 | 58.57 | 0.05 | 0.09 |
| (3-Chloropropyl)trichlorosilane | 43.26 | 43.44 | -0.18 | -0.42 |
| (3-Chloropropyl)trimethoxysilane | 46.53 | 46.62 | -0.09 | -0.19 |
| (3-Chloropropyl)trimethylsilane | 44.47 | 44.33 | 0.14 | 0.31 |
| (4-Bromophenoxy)trimethylsilane | 58.55 | 58.44 | 0.11 | 0.19 |
| (4-Chlorophenyl)trichlorosilane | 55.04 | 54.14 | 0.90 | 1.64 |
| (4-Methoxyphenyl)trimethylsilane | 56.94 | 56.73 | 0.21 | 0.37 |
| (4-Methylphenyl)trimethylsilane | 54.82 | 55.02 | -0.20 | -0.36 |
| (Bromomethyl)chlorodimethylsilane | 37.57 | 37.57 | 0.00 | 0.00 |
| (Bromomethyl)trimethylsilane | 38.09 | 38.08 | 0.01 | 0.03 |
| (Chloromethyl)trichlorosilane | 34.10 | 34.12 | -0.02 | -0.06 |
| (Chloromethyl)trimethylsilane | 35.13 | 35.01 | 0.12 | 0.34 |
| (Dichloromethyl)trichlorosilane | 39.36 | 39.06 | 0.30 | 0.76 |
| (Diethylamino)trimethylsilane | 47.33 | 47.09 | 0.24 | 0.51 |
| 1,1,1,3,5,5,5-Heptamethyltrisiloxane | 63.17 | 63.24 | -0.07 | -0.11 |
| 1,1,1,3,5,7,7,7-Octamethyltetrasiloxane | 77.46 | 77.53 | -0.07 | -0.09 |
| 1,1,3,3-Tetramethyl-1,3-diphenyldisiloxane | 88.87 | 88.71 | 0.16 | 0.18 |
| 1,1,3,3-Tetramethyldisiloxane | 40.19 | 40.23 | -0.04 | -0.10 |
| 1,2-Bis(tributylsilyl)acetylene | 138.06 | 138.22 | -0.16 | -0.12 |
| 1,2-Bis(triethylsilyl)ethane | 85.59 | 85.82 | -0.23 | -0.27 |
| 1,2-Bis(trimethylsilyl)acetylene | 55.18 | 55.24 | -0.06 | -0.11 |
| 1,2-Dis(trimethylsilyl)-ethylene | 58.50 | 58.06 | 0.44 | 0.75 |
| 1,3,5-Trisilacyclohexane | 43.69 | 43.44 | 0.25 | 0.57 |
| 1,3-Bis(bromomethyl)tetramethyldisiloxane | 64.41 | 64.45 | -0.04 | -0.06 |
| 1,3-Bis(chloromethyl)tetramethyldisiloxane | 58.30 | 58.31 | -0.01 | -0.02 |
| 1,3-Bis(dichloromethyl)tetramethyldisiloxane | 68.07 | 68.19 | -0.12 | -0.18 |
| 1,3-Bis(trimethylsiloxy)benzene | 75.39 | 75.18 | 0.21 | 0.28 |
| 1,3-Divinyl-1,1,3,3-tetramethyldisiloxane | 57.23 | 57.33 | -0.10 | -0.17 |
| 1-Heptyltrifluorosilane | 41.32 | 41.07 | 0.25 | 0.61 |
| 2,2,4,4,6,6-Hexamethylcyclotrisilazane | 63.90 | 63.78 | 0.12 | 0.19 |
| 2,4,6,8,10,12-Hexamethylcyclohexasiloxane | 85.86 | 85.74 | 0.12 | 0.14 |
| 2,4,6,8-Tetramethylcyclotetrasiloxane | 57.13 | 57.16 | -0.03 | -0.05 |
| 2,4,6-Trimethyl-2,4,6-triphenylcyclotrisiloxane | 115.86 | 115.59 | 0.27 | 0.23 |
| 2-Butylsilane | 31.02 | 31.09 | -0.07 | -0.23 |
| 2-Pentyloxytrimethylsilane | 49.75 | 49.57 | 0.18 | 0.36 |
| 2-Silylpentasilane | 73.17 | 73.09 | 0.08 | 0.11 |
| 2-Silyltetrasilane | 61.12 | 61.05 | 0.07 | 0.11 |
| 2-Silyltrisilane | 48.88 | 49.01 | -0.13 | -0.27 |
| 3-(Triethoxysilyl)-1-propanamine | 59.24 | 59.23 | 0.01 | 0.02 |
| 3-(Trimethylsilyl)-1-propanol | 41.55 | 40.94 | 0.61 | 1.47 |
| 3-Mercaptopropyl-trimethoxysilane | 49.46 | 49.49 | -0.03 | -0.06 |
| 4-Bromophenyltrimethylsilane | 57.19 | 57.80 | -0.61 | -1.07 |
| 4-Chlorophenoxytriethylsilane | 69.66 | 69.38 | 0.28 | 0.40 |
| 4-Fluorophenyltrimethylsilane | 50.34 | 50.11 | 0.23 | 0.46 |
| 4-Trifluoromethylphenyltrimethylsilane | 54.63 | 55.30 | -0.67 | -1.23 |
| 4-Trimethylsiloxyphenyltrimethylsilane | 74.63 | 74.54 | 0.09 | 0.12 |
| Allylchlorodimethylsilane | 37.98 | 38.71 | -0.73 | -1.92 |
| Allylmethyldichlorosilane | 38.14 | 38.50 | -0.36 | -0.94 |
| Allyltrichlorosilane | 38.97 | 38.33 | 0.64 | 1.64 |
| Allyltriethoxysilane | 55.73 | 55.49 | 0.24 | 0.43 |
| Allyltrimethylsilane | 39.14 | 39.22 | -0.08 | -0.20 |
| Amylsilane | 35.64 | 35.67 | -0.03 | -0.08 |
| Benzyltrimethylsilane | 55.11 | 54.83 | 0.28 | 0.51 |
| Bis(butylthio) 2-(diethylmethylsilyl)ethyl borane | 101.77 | 102.28 | -0.51 | -0.50 |
| Bis(diethyl)disiloxane | 58.54 | 58.51 | 0.03 | 0.05 |
| Bis(diethylmethylsilyl)amine | 69.24 | 69.58 | -0.34 | -0.49 |
| Bis(diethylsilyl)amine | 61.40 | 61.24 | 0.16 | 0.26 |
| Bis(dimethylamino)bis(diethylamino)silane | 79.50 | 79.36 | 0.14 | 0.18 |
| Bis(dimethylphenylsilyl)amine | 91.08 | 91.06 | 0.02 | 0.02 |
| Bis(ethyldimethylsilyl)amine | 61.01 | 60.44 | 0.57 | 0.93 |
| Bis(ethylisobutyl)disiloxane | 76.95 | 76.95 | 0.00 | 0.00 |
| Bis(ethylphenyl)disiloxane | 88.84 | 89.13 | -0.29 | -0.33 |
| Bis(trichlorosilyl)methane | 51.08 | 51.72 | -0.64 | -1.25 |
| Bis(triethylsilyl)amine | 78.33 | 78.72 | -0.39 | -0.50 |
| Bis(trihexylsilyl)acetylene | 193.90 | 193.78 | 0.12 | 0.06 |
| Bis(trimethoxysilyl)amine | 56.30 | 56.38 | -0.08 | -0.14 |
| Bis(trimethoxysilylamino)dimethylsilane | 77.61 | 77.64 | -0.03 | -0.04 |
| Bis(trimethylsilylamino)dimethylsilane | 71.81 | 72.56 | -0.75 | -1.04 |
| Bromotriethylsilane | 46.44 | 46.60 | -0.16 | -0.34 |
| Bromotrimethylsilane | 32.92 | 32.89 | 0.03 | 0.09 |
| Butoxytrimethylsilane | 44.88 | 44.93 | -0.05 | -0.11 |
| Butylsilane | 30.90 | 31.04 | -0.14 | -0.45 |
| Butyltrichlorosilane | 43.18 | 43.27 | -0.09 | -0.21 |
| Butyltriisothiocyanatosilane | 73.92 | 73.73 | 0.19 | 0.26 |
| Chloro(chloromethyl)dimethylsilane | 34.43 | 34.50 | -0.07 | -0.20 |
| Chloro(dichloromethyl)dimethylsilane | 39.39 | 39.44 | -0.05 | -0.13 |
| Chlorodiethylsilane | 34.92 | 34.70 | 0.22 | 0.63 |
| Chlorodimethylphenylsilane | 49.33 | 49.70 | -0.37 | -0.75 |
| Chlorodimethylsilane | 25.90 | 25.56 | 0.34 | 1.31 |
| Chloroethyldimethylsilane | 35.15 | 34.39 | 0.76 | 2.16 |
| Chloromethylphenylsilane | 45.46 | 45.44 | 0.02 | 0.04 |
| Chlorotriethylsilane | 43.54 | 43.53 | 0.01 | 0.02 |
| Chlorotrimethylsilane | 29.88 | 29.82 | 0.06 | 0.20 |
| Chlorovinyldimethylsilane | 34.49 | 34.01 | 0.48 | 1.39 |
| cis-1,2-Bis(trimethylsilyl)-3,3-dichlorocyclopropane | 71.37 | 70.62 | 0.75 | 1.05 |
| cis-1,2-Dis(trimethylsilyl)-ethylene | 57.88 | 58.06 | -0.18 | -0.31 |
| Cyclohexyloxytrimethylsilane | 52.12 | 52.06 | 0.06 | 0.12 |
| Cyclohexyltrifluorosilane | 34.26 | 34.35 | -0.09 | -0.26 |
| Decamethylcyclopentasiloxane | 93.33 | 93.25 | 0.08 | 0.09 |
| Decamethyltetrasiloxane | 86.18 | 86.25 | -0.07 | -0.08 |
| Decyldiphenylnonylsilane | 148.69 | 148.68 | 0.01 | 0.01 |
| Decyldiphenylsilane | 106.74 | 107.04 | -0.30 | -0.28 |
| Decyloxytrimethylsilane | 72.71 | 72.71 | 0.00 | 0.00 |
| Di(cyclohexyloxy)dimethylsilane | 74.01 | 73.82 | 0.19 | 0.26 |
| Diallyldimethylsilane | 48.34 | 48.11 | 0.23 | 0.48 |
| Diamylsilane | 58.60 | 58.56 | 0.04 | 0.07 |
| Dibutyldiisothiocyanatosilane | 77.77 | 77.84 | -0.07 | -0.09 |
| Dibutyldinonylsilane | 131.54 | 131.95 | -0.41 | -0.31 |
| Dibutylmethylsilyl bromide | 60.64 | 60.55 | 0.09 | 0.15 |
| Dibutylnonylsilane | 90.16 | 90.31 | -0.15 | -0.17 |
| Dibutylsilane | 49.39 | 49.30 | 0.09 | 0.18 |
| Dichloro(chloromethyl)methylsilane | 34.17 | 34.29 | -0.12 | -0.35 |
| Dichloro(dichloromethyl)methylsilane | 39.13 | 39.23 | -0.10 | -0.26 |
| Dichlorodiethylsilane | 38.71 | 38.75 | -0.04 | -0.10 |
| Dichlorodimethylsilane | 29.65 | 29.61 | 0.04 | 0.13 |
| Dichlorodiphenylsilane | 69.99 | 69.37 | 0.62 | 0.89 |
| Dichloromethylphenylsilane | 48.81 | 49.49 | -0.68 | -1.39 |
| Dicosamethyldecasiloxane | 197.51 | 198.15 | -0.64 | -0.32 |
| Didecyldiphenylsilane | 153.40 | 153.31 | 0.09 | 0.06 |
| Diethoxydimethylsilane | 40.99 | 41.04 | -0.05 | -0.12 |
| Diethoxydiphenylsilane | 81.07 | 80.80 | 0.27 | 0.33 |
| Diethoxymethylphenylsilane | 60.85 | 60.92 | -0.07 | -0.12 |
| Diethoxymethylsilane | 36.84 | 36.68 | 0.16 | 0.43 |
| Diethyl 2,2-diethylhydrazinosilane | 55.43 | 55.86 | -0.43 | -0.78 |
| Diethyl 2,2-dimethylhydrazinosilane | 46.39 | 46.68 | -0.29 | -0.63 |
| Diethyl bis(2,2-diethylhydrazino)silane | 81.18 | 80.88 | 0.30 | 0.37 |
| Diethyl bis(2,2-dimethylhydrazino)silane | 62.47 | 62.52 | -0.05 | -0.08 |
| Diethyl diethylaminosilane | 52.34 | 52.06 | 0.28 | 0.53 |
| Diethyldifluorosilane | 27.74 | 27.83 | -0.09 | -0.32 |
| Diethyldiisothiocyanatosilane | 59.55 | 59.32 | 0.23 | 0.39 |
| Diethylmethylchlorosilane | 38.62 | 38.96 | -0.34 | -0.88 |
| Diethylmethylsilanol | 35.43 | 35.61 | -0.18 | -0.51 |
| Diethylnonylsilane | 71.60 | 71.79 | -0.19 | -0.27 |
| Diethyloctylsilane | 67.23 | 67.16 | 0.07 | 0.10 |
| Diethylphenyl 1-isopropoxyethoxysilane | 80.26 | 80.12 | 0.14 | 0.17 |
| Diethylsilane | 30.71 | 30.78 | -0.07 | -0.23 |
| Diethylsilanol | 31.62 | 31.25 | 0.37 | 1.17 |
| Difluorodiphenylsilane | 58.69 | 58.45 | 0.24 | 0.41 |
| Dimethoxydiphenylsilane | 71.70 | 71.48 | 0.22 | 0.31 |
| Dimethyl bis(2,2-diethylhydrazino)silane | 71.55 | 71.74 | -0.19 | -0.27 |
| Dimethyl bis(2,2-dimethylhydrazino)silane | 53.54 | 53.38 | 0.16 | 0.30 |
| Dimethyl bis(2-chloropropoxy)silane | 59.83 | 59.82 | 0.01 | 0.02 |
| Dimethyldi(2-ethylbutoxy)silane | 78.27 | 78.00 | 0.27 | 0.34 |
| Dimethyldi(2-octyloxy)silane | 96.44 | 96.62 | -0.18 | -0.19 |
| Dimethyldi-2-butoxysilane | 59.68 | 59.58 | 0.10 | 0.17 |
| Dimethyldi-2-pentoxysilane | 68.61 | 68.84 | -0.23 | -0.34 |
| Dimethyldiacetoxysilane | 40.81 | 40.82 | -0.01 | -0.02 |
| Dimethyldibutoxysilane | 59.63 | 59.56 | 0.07 | 0.12 |
| Dimethyldidodecyloxysilane | 133.43 | 133.64 | -0.21 | -0.16 |
| Dimethyldiheptoxysilane | 87.25 | 87.34 | -0.09 | -0.10 |
| Dimethyldihexoxysilane | 77.46 | 78.08 | -0.62 | -0.80 |
| Dimethyldiisopropoxysilane | 49.53 | 50.32 | -0.79 | -1.59 |
| Dimethyldiisothiocyanatosilane | 49.92 | 50.18 | -0.26 | -0.52 |
| Dimethyldimethoxysilane | 31.51 | 31.72 | -0.21 | -0.67 |
| Dimethyldinonyloxysilane | 105.67 | 105.86 | -0.19 | -0.18 |
| Dimethyldioctoxysilane | 96.50 | 96.60 | -0.10 | -0.10 |
| Dimethyldipentoxysilane | 68.38 | 68.82 | -0.44 | -0.64 |
| Dimethyldiphenoxysilane | 71.56 | 71.40 | 0.16 | 0.22 |
| Dimethyldiphenylsilane | 70.04 | 70.09 | -0.05 | -0.07 |
| Dimethyldipropoxysilane | 50.94 | 50.30 | 0.64 | 1.26 |
| Dimethylethylsilanol | 30.79 | 31.04 | -0.25 | -0.81 |
| Dimethylphenylsilane | 45.04 | 45.55 | -0.51 | -1.13 |
| Dimethylvinylethoxysilane | 39.82 | 39.86 | -0.04 | -0.10 |
| Dinonyldiphenylsilane | 144.50 | 144.05 | 0.45 | 0.31 |
| Diphenylmethylsilane | 65.28 | 65.43 | -0.15 | -0.23 |
| Diphenylmethylsilylamine | 68.03 | 68.05 | -0.02 | -0.03 |
| Diphenylnonylsilane | 102.30 | 102.41 | -0.11 | -0.11 |
| Diphenylsilane | 61.53 | 61.40 | 0.13 | 0.21 |
| Dipropyldifluorosilane | 37.24 | 37.09 | 0.15 | 0.40 |
| Dipropylsilane | 40.08 | 40.04 | 0.04 | 0.10 |
| Disilanomethane | 27.16 | 27.26 | -0.10 | -0.37 |
| Dodecamethylcyclohexasiloxane | 111.89 | 111.90 | -0.01 | -0.01 |
| Dodecamethylpentasiloxane | 104.79 | 104.90 | -0.11 | -0.10 |
| Eicosamethylnonasiloxane | 179.30 | 179.50 | -0.20 | -0.11 |
| Ethoxytriethylsilane | 49.10 | 49.38 | -0.28 | -0.57 |
| Ethoxytrihexylsilane | 105.58 | 104.94 | 0.64 | 0.61 |
| Ethoxytrimethylsilane | 35.67 | 35.67 | 0.00 | 0.00 |
| Ethyl bis(2,2-diethylhydrazino)silane | 71.76 | 71.89 | -0.13 | -0.18 |
| Ethyl bis(2,2-dimethylhydrazino)silane | 53.67 | 53.53 | 0.14 | 0.26 |
| Ethyl bis(2-chloropropoxy)silane | 59.73 | 60.03 | -0.30 | -0.50 |
| Ethyl bis(diethylamino)silane | 64.26 | 64.29 | -0.03 | -0.05 |
| Ethyl isobutyl 2-chloropropoxysilane | 59.24 | 59.06 | 0.18 | 0.30 |
| Ethyl tris(2,2-diethylhydrazino)silane | 96.93 | 96.81 | 0.12 | 0.12 |
| Ethylaminotriethylsilane | 51.46 | 51.36 | 0.10 | 0.19 |
| Ethylcyclohexyldifluorosilane | 44.31 | 44.26 | 0.05 | 0.11 |
| Ethyldibutoxysilane | 59.63 | 59.77 | -0.14 | -0.23 |
| Ethyldimethyl 1-(3-pentoxy)ethoxysilane | 64.89 | 64.93 | -0.04 | -0.06 |
| Ethylisobutylsilanol | 40.40 | 40.47 | -0.07 | -0.17 |
| Ethylphenylchlorosilane | 49.44 | 50.01 | -0.57 | -1.15 |
| Ethyltributoxysilane | 78.67 | 78.95 | -0.28 | -0.36 |
| Ethyltrichlorosilane | 33.83 | 34.01 | -0.18 | -0.53 |
| Ethyltriethoxysilane | 51.50 | 51.17 | 0.33 | 0.64 |
| Ethyltriisothiocyanatosilane | 64.17 | 64.47 | -0.30 | -0.47 |
| Ethyltrimethoxysilane | 37.01 | 37.19 | -0.18 | -0.49 |
| Fluoroethyldiisopropylsilane | 47.71 | 47.87 | -0.16 | -0.34 |
| Fluorotributylsilane | 66.71 | 66.29 | 0.42 | 0.63 |
| Fluorotriethylsilane | 38.10 | 38.51 | -0.41 | -1.08 |
| Fluorotripentylsilane | 80.30 | 80.18 | 0.12 | 0.15 |
| Fluorotripropylsilane | 52.33 | 52.40 | -0.07 | -0.13 |
| Heptasilane | 84.77 | 84.84 | -0.07 | -0.08 |
| Heptyloxytrimethylsilane | 58.80 | 58.82 | -0.02 | -0.03 |
| Hexadecamethylheptasiloxane | 142.31 | 142.20 | 0.11 | 0.08 |
| Hexaethyldisiloxane | 75.92 | 76.37 | -0.45 | -0.59 |
| Hexamethyldisilane | 51.42 | 51.36 | 0.06 | 0.12 |
| Hexamethyldisiloxane | 48.94 | 48.95 | -0.01 | -0.02 |
| Hexapropyldisiloxane | 104.05 | 104.15 | -0.10 | -0.10 |
| Hexasilane | 72.78 | 72.80 | -0.02 | -0.03 |
| Hexyloxytrimethylsilane | 54.16 | 54.19 | -0.03 | -0.06 |
| Hexylsilane | 40.34 | 40.30 | 0.04 | 0.10 |
| HMDS | 51.55 | 51.30 | 0.25 | 0.48 |
| iso-Butylsilane | 31.05 | 31.00 | 0.05 | 0.16 |
| Isopentyloxytrimethylsilane | 49.54 | 49.52 | 0.02 | 0.04 |
| Isopropylmethylsilane | 30.66 | 30.89 | -0.23 | -0.75 |
| Isopropyltriisothiocyanatosilane | 69.52 | 69.15 | 0.37 | 0.53 |
| Isopropyltrimethylsilane | 38.47 | 39.58 | -1.11 | -2.89 |
| Methoxytriethylsilane | 44.49 | 44.72 | -0.23 | -0.52 |
| Methoxytrimethylsilane | 30.80 | 31.01 | -0.21 | -0.68 |
| Methoxytripropylsilane | 58.64 | 58.61 | 0.03 | 0.05 |
| Methyl bis(2,2-diethylhydrazino)silane | 67.18 | 67.32 | -0.14 | -0.21 |
| Methyl bis(2,2-dimethylhydrazino)silane | 48.80 | 48.96 | -0.16 | -0.33 |
| Methyl bis(2-chloropropoxy)silane | 55.37 | 55.46 | -0.09 | -0.16 |
| Methyl bis(diethylamino)silane | 59.99 | 59.72 | 0.27 | 0.45 |
| Methyl tris(2,2-diethylhydrazino)silane | 92.26 | 92.24 | 0.02 | 0.02 |
| Methylcyclohexyldifluorosilane | 39.68 | 39.69 | -0.01 | -0.03 |
| Methyldibutoxysilane | 54.87 | 55.20 | -0.33 | -0.60 |
| Methyldichloro-2-(2,4-dichlorophenoxy)ethylsilane | 70.31 | 70.12 | 0.19 | 0.27 |
| Methyldichloro-2-(4-chlorophenoxy)ethylsilane | 65.49 | 65.30 | 0.19 | 0.29 |
| Methyldichloro-2,4-dichlorophenoxysilane | 60.94 | 60.20 | 0.74 | 1.21 |
| Methyldichloro-2-butoxyethylsilane | 55.11 | 54.39 | 0.72 | 1.31 |
| Methyldichloro-2-isobutoxyethylsilane | 54.52 | 54.35 | 0.17 | 0.31 |
| Methyldichloro-2-phenoxyethylsilane | 60.39 | 60.48 | -0.09 | -0.15 |
| Methyldichloro-4-chlorophenoxysilane | 55.08 | 55.38 | -0.30 | -0.54 |
| Methyldichlorobutoxysilane | 44.66 | 44.64 | 0.02 | 0.04 |
| Methyldichlorophenoxysilane | 50.14 | 50.56 | -0.42 | -0.84 |
| Methyldiethyl-2-phenoxyethylsilane | 70.07 | 70.34 | -0.27 | -0.39 |
| Methyldiethylphenoxysilane | 60.29 | 59.99 | 0.30 | 0.50 |
| Methylnonylphenylsilane | 82.90 | 82.53 | 0.37 | 0.45 |
| Methyloctylphenylsilane | 78.18 | 77.90 | 0.28 | 0.36 |
| Methylphenyldifluorosilane | 38.26 | 38.57 | -0.31 | -0.81 |
| Methylphenylsilane | 40.82 | 41.52 | -0.70 | -1.71 |
| Methylpropylsilane | 30.73 | 30.84 | -0.11 | -0.36 |
| Methylsilanetriol triacetate | 46.27 | 46.27 | 0.00 | 0.00 |
| Methyltri(2-octyloxy)silane | 129.85 | 129.97 | -0.12 | -0.09 |
| Methyltributoxysilane | 74.39 | 74.38 | 0.01 | 0.01 |
| Methyltrichlorosilane | 29.13 | 29.44 | -0.31 | -1.06 |
| Methyltriheptyloxysilane | 116.01 | 116.05 | -0.04 | -0.03 |
| Methyltrihexyloxysilane | 102.11 | 102.16 | -0.05 | -0.05 |
| Methyltriisopentyloxysilane | 88.26 | 88.15 | 0.11 | 0.12 |
| Methyltripentyloxysilane | 88.20 | 88.27 | -0.07 | -0.08 |
| Methyltriphenoxysilane | 91.85 | 92.14 | -0.29 | -0.32 |
| Methylvinyldichlorosilane | 33.33 | 33.80 | -0.47 | -1.41 |
| N-(1,1-Dimethylpropyl)aminotriethylsilane | 64.79 | 65.18 | -0.39 | -0.60 |
| N-(3-(Trimethoxysilyl)propyl)-1,2-ethanediamine | 58.21 | 57.88 | 0.33 | 0.57 |
| N,N-Dibutylaminotriethylsilane | 78.65 | 79.32 | -0.67 | -0.85 |
| N,N-Diethylaminotriethylsilane | 60.99 | 60.80 | 0.19 | 0.31 |
| N,N-Diisobutylaminotriethylsilane | 78.67 | 79.24 | -0.57 | -0.72 |
| N-Fenchylaminotriethylsilane | 83.74 | 83.97 | -0.23 | -0.27 |
| N-Isopropylaminotriethylsilane | 56.05 | 55.92 | 0.13 | 0.23 |
| Nonyloxytrimethylsilane | 68.07 | 68.08 | -0.01 | -0.01 |
| N-Propylaminotriethylsilane | 56.11 | 55.99 | 0.12 | 0.21 |
| N-t-Butylaminotriethylsilane | 60.63 | 60.55 | 0.08 | 0.13 |
| Octadecamethyloctasiloxane | 160.19 | 160.85 | -0.66 | -0.41 |
| Octadecyltrichlorosilane | 108.02 | 108.09 | -0.07 | -0.06 |
| Octamethylcyclotetrasiloxane | 74.68 | 74.60 | 0.08 | 0.11 |
| Octamethyltrisiloxane | 67.44 | 67.60 | -0.16 | -0.24 |
| Octyloxytrimethylsilane | 63.43 | 63.45 | -0.02 | -0.03 |
| Pentasilane | 60.80 | 60.76 | 0.04 | 0.07 |
| Pentyloxytrimethylsilane | 49.52 | 49.56 | -0.04 | -0.08 |
| Pentyltrichlorosilane | 48.79 | 47.90 | 0.89 | 1.82 |
| Phenoxytriethylsilane | 64.47 | 64.56 | -0.09 | -0.14 |
| Phenoxytrimethylsilane | 51.17 | 50.85 | 0.32 | 0.63 |
| Phenoxytripropylsilane | 78.41 | 78.45 | -0.04 | -0.05 |
| Phenylsilane | 37.44 | 37.09 | 0.35 | 0.93 |
| Phenyltri(2-octyloxy)silane | 149.82 | 149.85 | -0.03 | -0.02 |
| Phenyltri(cyclohexyloxy)silane | 115.70 | 115.65 | 0.05 | 0.04 |
| Phenyltrichlorosilane | 48.92 | 49.32 | -0.40 | -0.82 |
| Phenyltrifluorosilane | 33.09 | 33.23 | -0.14 | -0.42 |
| Phenyltriisopentyloxysilane | 108.25 | 108.03 | 0.22 | 0.20 |
| Phenyltrimethylsilane | 49.88 | 50.21 | -0.33 | -0.66 |
| Propyltrichlorosilane | 38.46 | 38.64 | -0.18 | -0.47 |
| Propyltriisothiocyanatosilane | 68.69 | 69.10 | -0.41 | -0.60 |
| t-Butoxytriethylsilane | 58.54 | 58.59 | -0.05 | -0.09 |
| t-Butoxytrimethylsilane | 44.98 | 44.88 | 0.10 | 0.22 |
| t-Butoxytripropylsilane | 72.68 | 72.48 | 0.20 | 0.28 |
| Tetra(1H,1H,3H-perfluoropropyl)silicate | 72.19 | 72.10 | 0.09 | 0.12 |
| Tetra(1H,1H,5H-perfluoropentyl)silicate | 111.97 | 112.18 | -0.21 | -0.19 |
| Tetra(2-ethylbutyl) silicate | 125.53 | 126.42 | -0.89 | -0.71 |
| Tetra(diethylamino)silane | 97.33 | 97.72 | -0.39 | -0.40 |
| Tetra(dimethylamino)silane | 61.29 | 61.00 | 0.29 | 0.47 |
| Tetra-2-butoxysilane | 90.48 | 89.58 | 0.90 | 0.99 |
| Tetra-2-methyl-1-propoxysilane | 88.88 | 89.38 | -0.50 | -0.56 |
| Tetra-2-pentoxysilane | 108.98 | 108.10 | 0.88 | 0.81 |
| Tetra-3-methyl-1-butoxysilane | 107.23 | 107.90 | -0.67 | -0.62 |
| Tetrabutoxysilane | 88.88 | 89.54 | -0.66 | -0.74 |
| Tetracosamethylhendecasiloxane | 217.25 | 216.80 | 0.45 | 0.21 |
| Tetradecamethylcycloheptasiloxane | 130.84 | 130.55 | 0.29 | 0.22 |
| Tetradecamethylhexasiloxane | 123.45 | 123.55 | -0.10 | -0.08 |
| Tetraethoxysilane | 53.33 | 52.50 | 0.83 | 1.56 |
| Tetraethylsilane | 48.37 | 48.61 | -0.24 | -0.50 |
| Tetrahexoxysilane | 127.50 | 126.58 | 0.92 | 0.72 |
| Tetraisobutylsilane | 86.00 | 85.49 | 0.51 | 0.59 |
| Tetraisopropoxysilane | 70.82 | 71.06 | -0.24 | -0.34 |
| Tetraisopropylsilane | 66.92 | 67.33 | -0.41 | -0.61 |
| Tetramethylsilane | 29.95 | 30.33 | -0.38 | -1.27 |
| Tetramethyltetraphenylcyclotetrasiloxane | 154.31 | 154.12 | 0.19 | 0.12 |
| Tetramethyoxysilane | 33.51 | 33.86 | -0.35 | -1.04 |
| Tetraoctoxysilane | 163.90 | 163.62 | 0.28 | 0.17 |
| Tetrapentoxysilane | 107.38 | 108.06 | -0.68 | -0.63 |
| Tetrapropoxysilane | 70.65 | 71.02 | -0.37 | -0.52 |
| Tetrasilane | 48.89 | 48.72 | 0.17 | 0.35 |
| Tetravinylsilane | 46.88 | 47.09 | -0.21 | -0.45 |
| trans-1,2-Bis(trimethylsilyl)-3,3-dichlorocyclopropane | 71.02 | 70.62 | 0.40 | 0.56 |
| Tributylisothiocyanatosilane | 82.05 | 81.60 | 0.45 | 0.55 |
| Tributylsilane | 67.51 | 67.16 | 0.35 | 0.52 |
| Tributylsilanol | 67.79 | 67.96 | -0.17 | -0.25 |
| Tributylsilylamine | 69.61 | 69.78 | -0.17 | -0.24 |
| Trichloro-2-phenoxyethylsilane | 60.44 | 60.31 | 0.13 | 0.22 |
| Trichlorovinylsilane | 33.54 | 33.63 | -0.09 | -0.27 |
| Triethoxymethylsilane | 46.50 | 46.60 | -0.10 | -0.22 |
| Triethoxypentylsilane | 64.96 | 65.06 | -0.10 | -0.15 |
| Triethoxyphenylsilane | 66.15 | 66.48 | -0.33 | -0.50 |
| Triethyl 1-propoxyethoxysilane | 65.15 | 64.80 | 0.35 | 0.54 |
| Triethyl 2,2-diethylhydrazinosilane | 64.50 | 64.60 | -0.10 | -0.16 |
| Triethyl 2,2-dimethylhydrazinosilane | 55.48 | 55.42 | 0.06 | 0.11 |
| Triethylisothiocyanatosilane | 53.85 | 53.82 | 0.03 | 0.06 |
| Triethylsilane | 39.60 | 39.38 | 0.22 | 0.56 |
| Triethylsilanol | 40.59 | 40.18 | 0.41 | 1.01 |
| Triethylsilylamine | 42.07 | 42.00 | 0.07 | 0.17 |
| Triethylsilyloxytripropylsilane | 90.19 | 90.26 | -0.07 | -0.08 |
| Triethyltriphenylcyclotrisiloxane | 129.17 | 129.30 | -0.13 | -0.10 |
| Triisopropoxyvinylsilane | 65.03 | 64.71 | 0.32 | 0.49 |
| Triisopropylethoxysilane | 63.56 | 63.42 | 0.14 | 0.22 |
| Triisopropylphenylsilane | 77.50 | 77.96 | -0.46 | -0.59 |
| Triisopropylsilane | 53.57 | 53.42 | 0.15 | 0.28 |
| Triisopropylsilyl chloride | 57.72 | 57.57 | 0.15 | 0.26 |
| Trimethoxymethylsilane | 32.24 | 32.62 | -0.38 | -1.18 |
| Trimethoxyphenylsilane | 52.32 | 52.50 | -0.18 | -0.34 |
| Trimethoxysilylamine | 30.95 | 30.83 | 0.12 | 0.39 |
| Trimethyl 1-ethoxyethoxysilane | 46.52 | 46.46 | 0.06 | 0.13 |
| Trimethyl 1-isopropoxyethoxysilane | 51.15 | 51.10 | 0.05 | 0.10 |
| Trimethyl 2,2-diethylhydrazinosilane | 50.99 | 50.89 | 0.10 | 0.20 |
| Trimethyl 2,2-dimethylhydrazinosilane | 41.77 | 41.71 | 0.06 | 0.14 |
| Trimethylisothiocyanatosilane | 40.13 | 40.11 | 0.02 | 0.05 |
| Trimethylsilanol | 26.22 | 26.47 | -0.25 | -0.95 |
| Trimethylsilylaminodimethylphenylsilane | 71.09 | 71.18 | -0.09 | -0.13 |
| Trimethylsilylaminodiphenylmethylsilane | 91.05 | 91.06 | -0.01 | -0.01 |
| Trimethylsilylaminotriethylsilane | 65.00 | 65.01 | -0.01 | -0.02 |
| Trimethylsilylaminotrimethoxysilane | 53.70 | 53.84 | -0.14 | -0.26 |
| Trimethylsilylaminotriphenylsilane | 111.69 | 110.94 | 0.75 | 0.67 |
| Trimethylsilyloxytriethylsilane | 62.45 | 62.66 | -0.21 | -0.34 |
| Trimethylsilyloxytripropylsilane | 76.55 | 76.55 | 0.00 | 0.00 |
| Trimethylvinylsilane | 34.55 | 34.52 | 0.03 | 0.09 |
| Tripentylsilane | 81.54 | 81.05 | 0.49 | 0.60 |
| Tripropylsilane | 52.75 | 53.27 | -0.52 | -0.99 |
| Tris(dimethylamino)dibutylaminosilane | 88.58 | 88.70 | -0.12 | -0.14 |
| Trisilane | 36.61 | 36.68 | -0.07 | -0.19 |
| Vinyl tris(2-chloropropoxy)silane | 79.31 | 78.96 | 0.35 | 0.44 |
| Vinyldiethoxymethylsilane | 45.09 | 45.23 | -0.14 | -0.31 |
| Vinyltriacetoxysilane | 50.55 | 50.46 | 0.09 | 0.18 |
| Vinyltriethoxysilane | 50.75 | 50.79 | -0.04 | -0.08 |
| Vinyltrimethoxysilane | 36.41 | 36.81 | -0.40 | -1.10 |
