# Supplementary material for: Revision and Extension of a Generally Applicable Group-Additivity Method for the Calculation of the Refractivity and Polarizability of Organic Molecules
Source: Preprints.org preprint supplement (doi:10.20944/preprints202208.0543.v1), 2022-08-31
Supplement: Supplementary file 3 [file S07. Experimental vs. Calculated Refractivities of Boron Compounds.doc]

| **Molecule name** | **Refractivity exp** | **Refractivity calc** | **Deviation** | **Dev. in %** |
| --- | --- | --- | --- | --- |
| 1,2-Bis(dipentylborinoxy)ethane | 116.12 | 116.10 | 0.02 | 0.02 |
| 1,3,5-Tributylborazine | 79.59 | 79.86 | -0.27 | -0.34 |
| 1,3,5-Triethylborazine | 52.48 | 52.08 | 0.40 | 0.76 |
| 1,3-Bis(dibutoxyboryl)propane | 104.73 | 104.83 | -0.10 | -0.10 |
| 1,3-Bis(dichloroboryl)propane | 44.12 | 44.25 | -0.13 | -0.29 |
| 1,3-Bis(dimethoxyboryl)propane | 48.96 | 49.15 | -0.19 | -0.39 |
| 1,4-Bis(dichloroboryl)butane | 48.79 | 48.88 | -0.09 | -0.18 |
| 1,4-Bis(diethoxyboryl)butane | 73.12 | 72.42 | 0.70 | 0.96 |
| 1,5-Bis(diethoxyboryl)pentane | 77.13 | 77.05 | 0.08 | 0.10 |
| 1,6-Bis(diethoxyboryl)hexane | 81.81 | 81.68 | 0.13 | 0.16 |
| 2-Butoxy-2-bora-1,3-dioxacyclopentane | 37.13 | 36.61 | 0.52 | 1.40 |
| 2-Tolyl 3-tolyl propoxyborine | 82.11 | 81.86 | 0.25 | 0.30 |
| 2-Tolyl 4-tolyl propoxyborine | 82.26 | 81.86 | 0.40 | 0.49 |
| 2-Tolyl dibutoxyborine | 76.18 | 76.43 | -0.25 | -0.33 |
| 2-Tolyl diethoxyborine | 57.69 | 57.91 | -0.22 | -0.38 |
| 2-Tolyl dimethoxyborine | 48.14 | 48.59 | -0.45 | -0.93 |
| 2-Tolyl dipropoxyborine | 66.97 | 67.17 | -0.20 | -0.30 |
| 3-Tolyl dibutoxyborine | 76.48 | 76.43 | 0.05 | 0.07 |
| 3-Tolyl diethoxyborine | 58.08 | 57.91 | 0.17 | 0.29 |
| 3-Tolyl dimethoxyborine | 48.38 | 48.59 | -0.21 | -0.43 |
| 3-Tolyl dipropoxyborine | 67.26 | 67.17 | 0.09 | 0.13 |
| 4-Tolyl dibutoxyborine | 76.67 | 76.43 | 0.24 | 0.31 |
| 4-Tolyl diethoxyborine | 58.04 | 57.91 | 0.13 | 0.22 |
| 4-Tolyl dimethoxyborine | 48.49 | 48.59 | -0.10 | -0.21 |
| 4-Tolyl dipropoxyborine | 67.42 | 67.17 | 0.25 | 0.37 |
| Bis(2-tolyl)-N-ethylaminoborane | 79.12 | 78.87 | 0.25 | 0.32 |
| Bis(2-tolyl)-N-isobutylaminoborane | 88.08 | 88.09 | -0.01 | -0.01 |
| Bis(2-tolyl)-N-methylaminoborane | 74.00 | 74.28 | -0.28 | -0.38 |
| Bis(allylamino)borane | 40.89 | 41.33 | -0.44 | -1.08 |
| Bis(butylamino)borane | 51.24 | 51.21 | 0.03 | 0.06 |
| Bis(butylthio) 2-(diethylmethylsilyl)ethyl borane | 101.77 | 102.28 | -0.51 | -0.50 |
| Bis(butylthio) hexyl borane | 88.58 | 88.16 | 0.42 | 0.47 |
| Bis(butylthio) octyl borane | 98.30 | 97.42 | 0.88 | 0.90 |
| Bis(butylthio)borane | 60.17 | 60.27 | -0.10 | -0.17 |
| Bis(diallylamino)borane | 67.84 | 68.71 | -0.87 | -1.28 |
| Bis(diethylamino)borane | 51.54 | 51.43 | 0.11 | 0.21 |
| Bis(di-isoamylamino)borane | 107.11 | 106.83 | 0.28 | 0.26 |
| Bis(diisobutylamino)borane | 88.26 | 88.31 | -0.05 | -0.06 |
| Bis(ethylthio) butylborane | 60.19 | 60.38 | -0.19 | -0.32 |
| Bis(ethylthio) isobutylborane | 60.30 | 60.34 | -0.04 | -0.07 |
| Bis(ethylthio) isopropylborane | 55.34 | 55.77 | -0.43 | -0.78 |
| Bis(ethylthio) octyl borane | 78.77 | 78.90 | -0.13 | -0.17 |
| Bis(ethylthio) propylborane | 55.66 | 55.75 | -0.09 | -0.16 |
| Bis(ethylthio)borane | 41.16 | 41.75 | -0.59 | -1.43 |
| Bis(isobutyl) cyclohexylboronate | 72.44 | 72.12 | 0.32 | 0.44 |
| Bis(isopropylthio)borane | 51.08 | 50.99 | 0.09 | 0.18 |
| Bis(propylthio)borane | 50.77 | 51.01 | -0.24 | -0.47 |
| Bis(t-butylthio)borane | 61.77 | 61.01 | 0.76 | 1.23 |
| Bromo butylthio isopentylborane | 64.00 | 63.96 | 0.04 | 0.06 |
| Bromo ethylthio isopentylborane | 54.51 | 54.70 | -0.19 | -0.35 |
| Bromo ethylthio isopropylborane | 45.04 | 45.50 | -0.46 | -1.02 |
| Bromo ethylthio phenylborane | 57.27 | 56.67 | 0.60 | 1.05 |
| Butoxy chloro phenylborine | 56.56 | 56.22 | 0.34 | 0.60 |
| Butyl butoxy chloroborine | 49.43 | 49.66 | -0.23 | -0.47 |
| Butyl dibutoxyborine | 64.87 | 65.06 | -0.19 | -0.29 |
| Butylphenylboronic acid | 50.06 | 50.81 | -0.75 | -1.50 |
| Butylthiodiethylborane | 52.20 | 52.20 | 0.00 | 0.00 |
| Chloro 2-octoxy phenylborine | 74.42 | 74.75 | -0.33 | -0.44 |
| Chloro di(1,2,2-trimethylpropoxy)borine | 69.31 | 69.36 | -0.05 | -0.07 |
| Chloro di(2-octoxy)borine | 87.34 | 87.92 | -0.58 | -0.66 |
| Chloro di(sec-butoxy)borine | 50.69 | 50.88 | -0.19 | -0.37 |
| Chloro dibutoxyborine | 51.03 | 50.86 | 0.17 | 0.33 |
| Chloro diisobutoxyborine | 50.35 | 50.78 | -0.43 | -0.85 |
| Chloro dineopentoxyborine | 60.34 | 60.08 | 0.26 | 0.43 |
| Chloro dioctoxyborine | 88.29 | 87.90 | 0.39 | 0.44 |
| Chloro dipropoxyborine | 41.83 | 41.60 | 0.23 | 0.55 |
| Cyclohexyldichloroborane | 41.98 | 41.91 | 0.07 | 0.17 |
| Dibutoxy 2-hydroxyethoxy borine | 59.48 | 58.68 | 0.80 | 1.34 |
| Dibutylboronic anhydride | 86.44 | 87.19 | -0.75 | -0.87 |
| Dibutylbutylaminoborane | 65.68 | 65.39 | 0.29 | 0.44 |
| Dibutylethylthioborane | 61.49 | 61.46 | 0.03 | 0.05 |
| Dibutylphenylaminoborane | 72.53 | 72.57 | -0.04 | -0.06 |
| Dibutylphenylthioborane | 76.46 | 76.82 | -0.36 | -0.47 |
| Dichloro 4-chlorobutoxyborine | 40.73 | 40.65 | 0.08 | 0.20 |
| Dichloro butoxyborine | 36.03 | 35.85 | 0.18 | 0.50 |
| Dichloro isobutoxyborine | 36.55 | 35.81 | 0.74 | 2.02 |
| Dichloro neopentoxyborine | 40.51 | 40.46 | 0.05 | 0.12 |
| Dichloro octoxyborine | 53.85 | 54.37 | -0.52 | -0.97 |
| Dichloro propoxyborine | 30.62 | 31.22 | -0.60 | -1.96 |
| Diisoamylbutylthioborane | 79.99 | 79.90 | 0.09 | 0.11 |
| Diisobutylboronic anhydride | 87.73 | 87.03 | 0.70 | 0.80 |
| Diisobutylbutylthioborane | 71.06 | 70.64 | 0.42 | 0.59 |
| Diisopentylboronic anhydride | 105.56 | 105.55 | 0.01 | 0.01 |
| Diisopropylboronic anhydride | 68.78 | 68.75 | 0.03 | 0.04 |
| Dioctyl butoxyborine | 100.02 | 100.79 | -0.77 | -0.77 |
| Dipropylbutylthioborane | 61.51 | 61.46 | 0.05 | 0.08 |
| Dipropylethylthioborane | 52.48 | 52.20 | 0.28 | 0.53 |
| Dipropylisobutylaminoborane | 55.99 | 56.09 | -0.10 | -0.18 |
| Dipropylphenylaminoborane | 63.31 | 63.31 | 0.00 | 0.00 |
| Dipropylphenylthioborane | 67.67 | 67.56 | 0.11 | 0.16 |
| Ethyl phenyl butoxyborine | 61.09 | 61.05 | 0.04 | 0.07 |
| Ethylphenylboronic acid | 42.13 | 41.55 | 0.58 | 1.38 |
| Ethylphenylboronic anhydride | 82.57 | 81.79 | 0.78 | 0.94 |
| Ethylthio dioctyl borane | 98.03 | 98.50 | -0.47 | -0.48 |
| Ethylthiodiethylborane | 42.82 | 42.94 | -0.12 | -0.28 |
| Hexyldichloroborane | 44.07 | 44.03 | 0.04 | 0.09 |
| Isobutyl cyclohexylchloroboronate | 56.96 | 56.76 | 0.20 | 0.35 |
| o-Tolylamino(diethylamino)borane | 63.48 | 63.31 | 0.17 | 0.27 |
| Pentyldichloroborane | 39.49 | 39.40 | 0.09 | 0.23 |
| Phenyl 2-tolyl propoxyborine | 77.12 | 77.05 | 0.07 | 0.09 |
| Phenyl di(sec-butoxy)borine | 71.45 | 71.64 | -0.19 | -0.27 |
| Phenyl di(sec-octoxy)borine | 108.55 | 108.68 | -0.13 | -0.12 |
| Phenyl dibutoxyborine | 71.32 | 71.62 | -0.30 | -0.42 |
| Phenyl diethoxyborine | 52.87 | 53.10 | -0.23 | -0.44 |
| Phenyl diisobutoxyborine | 71.44 | 71.54 | -0.10 | -0.14 |
| Phenyl dimethoxyborine | 43.45 | 43.78 | -0.33 | -0.76 |
| Phenyl dipropoxyborine | 62.40 | 62.36 | 0.04 | 0.06 |
| Phenylamino(diethylamino)borane | 58.85 | 58.50 | 0.35 | 0.59 |
| Phenylboron dichloride | 41.64 | 41.33 | 0.31 | 0.74 |
| Phenylpropylboronic acid | 46.40 | 46.18 | 0.22 | 0.47 |
| Phenylpropylboronic anhydride | 90.30 | 91.05 | -0.75 | -0.83 |
| Tri(1,2,2-trimethylpropoxy)borine | 93.61 | 94.28 | -0.67 | -0.72 |
| Tri(1,3-dichloro-2-propoxy)borine | 81.12 | 81.47 | -0.35 | -0.43 |
| Tri(1-chloroethoxy)borine | 52.99 | 53.51 | -0.52 | -0.98 |
| Tri(1-ethoxycarbonylethoxy)borine | 85.93 | 85.70 | 0.23 | 0.27 |
| Tri(1-methoxyethoxy)borine | 57.42 | 57.14 | 0.28 | 0.49 |
| Tri(2-ethoxycarbonylethoxy)borine | 84.97 | 85.67 | -0.70 | -0.82 |
| Tri(2-pentoxy)borine | 80.11 | 80.45 | -0.34 | -0.42 |
| Tri(butylthio)borane | 87.47 | 87.36 | 0.11 | 0.13 |
| Tri(ethoxycarbonylmethoxy)borine | 71.14 | 71.78 | -0.64 | -0.90 |
| Tri(propylthio)borane | 73.47 | 73.47 | 0.00 | 0.00 |
| Tri(t-butoxy)borine | 66.77 | 66.38 | 0.39 | 0.58 |
| Tributyl borate | 66.65 | 66.53 | 0.12 | 0.18 |
| Tridecyl borate | 149.41 | 149.87 | -0.46 | -0.31 |
| Triethyl borate | 38.69 | 38.75 | -0.06 | -0.16 |
| Triethylborane | 33.72 | 34.51 | -0.79 | -2.34 |
| Triheptyl borate | 109.18 | 108.20 | 0.98 | 0.90 |
| Triisobutylborane | 62.31 | 62.17 | 0.14 | 0.22 |
| Triisopentoxyborine | 80.14 | 80.30 | -0.16 | -0.20 |
| Triisopentylborane | 76.54 | 76.06 | 0.48 | 0.63 |
| Triisopropyl borate | 52.52 | 52.67 | -0.15 | -0.29 |
| Trimethoxyborine | 24.86 | 24.77 | 0.09 | 0.36 |
| Trioctyl borate | 122.30 | 122.09 | 0.21 | 0.17 |
| Tripentoxyborine | 80.42 | 80.42 | 0.00 | 0.00 |
| Tripropyl borate | 52.55 | 52.64 | -0.09 | -0.17 |
| Tripropylborane | 48.54 | 48.40 | 0.14 | 0.29 |
| Tris(ethylthio)borane | 59.41 | 59.58 | -0.17 | -0.29 |
