# Supplementary material for: Revision and Extension of a Generally Applicable Group-Additivity Method for the Calculation of the Refractivity and Polarizability of Organic Molecules
Source: Preprints.org preprint supplement (doi:10.20944/preprints202208.0543.v1), 2022-08-31
Supplement: Supplementary file 4 [file S08. Refractivity Outliers.doc]

| **Name** | **Refractivity exp.** | **Refractivity calc** | **Difference** |
| --- | --- | --- | --- |
| Tetraisothiocyanatosilane | 49.55 | 69.83 | -20.28 |
| 1-Butyltetrahydrothiophenium bis(trifluoromethylsulfonyl)amide | 59.14 | 77.28 | -18.14 |
| Phthalide | 72.84 | 55.04 | 17.80 |
| Tributylsilyl bromide | 87.75 | 74.35 | 13.40 |
| PEG-5 cocomonium methylsulfate | 97.54 | 84.61 | 12.93 |
| N-Nitroso-N-methylaniline | 40.03 | 28.52 | 11.51 |
| Dihexylphenylcarbinol | 99.72 | 88.24 | 11.48 |
| Omethoate | 47.40 | 58.40 | -11.00 |
| Amiton | 71.39 | 81.98 | -10.59 |
| Demeton-S-methyl | 57.04 | 67.50 | -10.46 |
| 1-(2-Cyanoethyl)-3-octylimidazolium trifluoromethanesulfonate | 95.85 | 85.71 | 10.14 |
| Methylhydrazine | 13.69 | 4.29 | 9.40 |
| 3-(2-Cyanoethyl)-1-hexylimidazolium 1,1,1-trifluoromethanesulfonate | 85.35 | 76.45 | 8.90 |
| 2-Phenoxyvinyl bis(dimethylamino) phosphorus oxide | 62.86 | 71.65 | -8.79 |
| Bis(perfluorobutyl) 3-methylglutarate | 82.57 | 74.39 | 8.18 |
| 4-Ethoxyazobenzene | 78.57 | 70.47 | 8.10 |
| Bis(butylthio) 2-phenylethyl borane | 102.02 | 94.23 | 7.79 |
| Trimethylammonium hydrogen sulfate | 26.69 | 34.30 | -7.61 |
| 1,2,3,4-Tetrachlorobenzene | 38.67 | 45.80 | -7.13 |
| Dimethyldi-2-dodecoxysilane | 126.53 | 133.63 | -7.10 |
| 2-Ethoxyvinyl bis(diethylamino) phosphorus oxide | 67.51 | 74.52 | -7.01 |
| Tetra(1H,1H-perfluoropropyl)silicate | 66.78 | 73.62 | -6.84 |
| Dipropylphosphine | 46.78 | 40.09 | 6.69 |
| 1-(2-Cyanoethyl)-3-octylimidazolium benzenesulfonate | 99.04 | 105.62 | -6.58 |
| Trimethylammonium acetate | 26.93 | 33.20 | -6.27 |
| Di-n-butylsulfoxide | 54.12 | 47.98 | 6.14 |
| 1-(2-Cyanoethyl)-3-octylimidazolium dodecylsulfate | 131.08 | 137.11 | -6.03 |
| Hexyl ethoxy S-ethyl dithiophosphinate | 68.06 | 74.08 | -6.02 |
| Truxene | 114.91 | 109.41 | 5.50 |
| trans-Stilbene | 65.77 | 60.38 | 5.39 |
| 2-Phenoxyvinyl bis(1-piperidyl) phosphorus oxide | 89.67 | 94.99 | -5.32 |
| L-Glutamic acid 1,5-bis(1-methylethyl) ester dodecyl sulfate | 133.53 | 128.21 | 5.32 |
| 1,6-Bis(7-H-perfluoroheptoxy)hexane | 108.93 | 103.68 | 5.25 |
| 2,5-Diphenyloxazole | 70.72 | 65.53 | 5.19 |
| 2-Iodopentane | 43.66 | 38.49 | 5.17 |
| 1-Ethyltetrahydrothiophenium nitrate | 38.21 | 43.34 | -5.13 |
| 2-Dimethylaminoethyl dimethylammonium acetate | 45.69 | 50.80 | -5.11 |
| Phenazone | 57.44 | 62.54 | -5.10 |
| 1,1,5,5-Tetra(ethylthio)-pent-2-yne | 97.39 | 92.29 | 5.10 |
| Triethylammonium hydrogen sulfate | 52.66 | 47.56 | 5.10 |
| 2-Ethyl-3-(2-furyl)acrolein | 47.88 | 42.84 | 5.04 |
| Hexafluoro-1,3-butadiene | 24.06 | 19.06 | 5.00 |
| 1-Ethoxy-l,3,5-hexatriene | 44.83 | 39.86 | 4.97 |
| 3-(2-Cyanoethyl)-1-hexylimidazolium benzenesulfonate | 91.39 | 96.36 | -4.97 |
| Triphenoxyisothiocyanatosilane | 97.36 | 102.29 | -4.93 |
| N-Ethylpyridinium trifluoroacetate | 51.01 | 46.09 | 4.92 |
| Dibenzo[b,e]pyridine | 64.30 | 59.40 | 4.90 |
| 3-(2-Cyanoethyl)-1-hexylimidazolium dodecyl sulfate | 122.95 | 127.85 | -4.90 |
| Ethyl-bis(butylthio)-thiophosphinate | 78.58 | 83.45 | -4.87 |
| 3-Bromo-3-chloropentane | 33.53 | 38.31 | -4.78 |
| 2-Methyl-3-(2-furyl)acrolein | 42.93 | 38.21 | 4.72 |
| 9,10-Anthraquinone | 64.10 | 59.38 | 4.72 |
| Ethylisobutylchlorosilane | 39.21 | 43.88 | -4.67 |
| N,N-Dimethyl-N-ethylammonium acetate | 33.05 | 37.62 | -4.57 |
| Bis(diethylamino)bis(dibutylamino)silane | 130.21 | 134.71 | -4.50 |
| Dimethyldidecoxysilane | 110.74 | 115.11 | -4.37 |
| Dimethyl decyl isopropylammonium bis(trifluoromethylsulfonyl)amide | 111.11 | 106.76 | 4.35 |
| Dixanthylene | 114.20 | 109.92 | 4.28 |
| Quadricyclane | 30.01 | 25.75 | 4.26 |
| Diethylammonium hydrogen sulfate | 33.89 | 38.15 | -4.26 |
| Tetra-1-dodecoxysilane | 233.40 | 237.66 | -4.26 |
| 1-Benzyl-3-methylimidazolium 2-acryloamido-2-methylpropanesulfonate | 103.89 | 99.64 | 4.25 |
| Benzoylacetone | 50.05 | 45.82 | 4.23 |
| trans,trans-2,4-Hexadienoyl chloride | 39.26 | 35.08 | 4.18 |
| trans,trans-2,4-Heptadienal | 38.87 | 34.70 | 4.17 |
| Ethyl 3-methyl-3-phenylglycidate | 59.88 | 55.74 | 4.14 |
| 9-H-Perfluorononyl 2-ethylhexanoate | 90.16 | 86.05 | 4.11 |
| 1-(2-Cyanoethyl)-3-hexylimidazolium bis(2-ethylhexyl)sulfosuccinate | 163.70 | 167.80 | -4.10 |
| Benzo[b]fluorene | 76.21 | 72.11 | 4.10 |
| 1-Octyl-3-methylimidazolium thiocyanate | 80.61 | 76.60 | 4.01 |
| trans-Azobenzene | 63.27 | 59.26 | 4.01 |
| Fluoranthene | 71.49 | 67.48 | 4.01 |
| Vinylphenylphosphinic chloride | 42.95 | 46.91 | -3.96 |
| 1-Chloro-1,1-difluoroethane | 20.31 | 16.36 | 3.95 |
| 1-Propyl-3-methylimidazolium methylsulfate | 50.18 | 53.98 | -3.80 |
| Methyl ethylxanthate | 34.82 | 38.54 | -3.72 |
| N,N-Dimethylaminotrimethylsilane | 41.59 | 37.89 | 3.70 |
| N-Hexylpyridinium trifluoroacetate | 60.96 | 64.61 | -3.65 |
| 3,3'-Dimethylazobenzene | 72.51 | 68.88 | 3.63 |
| Salicylic acid | 31.18 | 34.80 | -3.62 |
| trans,trans-2,4-Hexadienal | 33.64 | 30.07 | 3.57 |
| 2-Bromocyclohexanone | 39.40 | 35.86 | 3.54 |
| 1-Phenyl-2-hexyl-3,5-dimethylpyrazolium tetrafluoroborate | 85.60 | 82.07 | 3.53 |
| Dipivaloylmethane | 57.04 | 53.59 | 3.45 |
| 6,6,7,7,8,8,8-Heptafluoro-2,2-dimethyl-3,5-octanedione | 53.47 | 50.03 | 3.44 |
| N-Ethyl-N,N-dimethylammonium phenylacetate | 58.89 | 62.20 | -3.31 |
| 5-(Hydroxymethyl)-2-furaldehyde | 33.94 | 30.63 | 3.31 |
| Diethylammonium acetate | 33.75 | 37.05 | -3.30 |
| Butyric aldehyde diethylacetal | 45.68 | 42.39 | 3.29 |
| Methylsuccinic acid | 25.19 | 28.48 | -3.29 |
| Cinnamaldehyde | 44.20 | 40.92 | 3.28 |
| Tris(3-hydroxypropyl)phosphine | 55.31 | 58.58 | -3.27 |
| Schradan | 72.20 | 68.93 | 3.27 |
| 2,2'-Dimethylazobenzene | 72.12 | 68.88 | 3.24 |
| 3-Ethylbenzoic acid | 45.64 | 42.40 | 3.24 |
| O,O,O-Triethyl thiophosphate | 38.82 | 35.60 | 3.22 |
| 1-Nitro-2-phenoxybenzene | 56.72 | 59.88 | -3.16 |
| 3,4,5,6-Tetrahydro-7-methoxy-2H-azepine | 39.49 | 36.35 | 3.14 |
| 2-Hydroxyethylammonium oleate | 106.05 | 102.91 | 3.14 |
| 4-Nitrothioanisole | 49.20 | 46.10 | 3.10 |
| Ethyl fumarate | 36.18 | 33.11 | 3.07 |
| Benzylideneacetone | 48.43 | 45.36 | 3.07 |
| 3-Methylbenzoyl chloride | 44.67 | 41.64 | 3.03 |
| 2,2-Diethyl-1,3-propanediol | 34.32 | 37.34 | -3.02 |
| Tri(1-phenylethoxy)borine | 109.47 | 112.49 | -3.02 |
| Tetramethyldiaminobutane | 49.95 | 47.00 | 2.95 |
| 1-Ethylthio-5,5-bis(ethoxy)-pent-1-en-3-yne | 64.96 | 62.01 | 2.95 |
| O,O-diisobutyl isobutylthiophosphinate | 73.14 | 76.08 | -2.94 |
| (3-Bromo-1-propenyl)benzene | 51.09 | 48.18 | 2.91 |
| Octafluorobutyl-1,4-diisocyanate | 38.69 | 35.80 | 2.89 |
| Isopropyl phophorusoxy dichloride | 37.20 | 34.31 | 2.89 |
| 1,2-Dibromo-1,2-dichloroethane | 39.24 | 36.36 | 2.88 |
| Chloromethylsulfenyl chloride | 23.73 | 26.61 | -2.88 |
| N'-Ethyl-N,N-dimethyl-1,2-ethanediamine | 40.03 | 37.18 | 2.85 |
| N-Isobutyl-3-sulfobutan-1-aminium hydrogen sulfate | 64.42 | 67.27 | -2.85 |
| Phenylpropargyl aldehyde | 42.36 | 39.52 | 2.84 |
| Diethyl benzylidenemalonate | 69.94 | 67.11 | 2.83 |
| Pentafluorobenzenethiol | 36.83 | 34.02 | 2.81 |
| Oxotremorine | 62.31 | 59.51 | 2.80 |
| 2-Methoxybenzylalcohol | 42.09 | 39.30 | 2.79 |
| 3-(2-Cyanoethyl)-1-hexylimidazolium 3-sulfobenzoate | 100.01 | 102.80 | -2.79 |
| 4-t-Butylbenzoyl chloride | 58.27 | 55.50 | 2.77 |
| 4-Phenyl-3-butyn-2-one | 46.72 | 43.96 | 2.76 |
| 2-t-Butyl-5-methylphenol | 54.59 | 51.84 | 2.75 |
| Phenazine | 59.11 | 56.36 | 2.75 |
| 4-Butylbenzoyl chloride | 58.27 | 55.53 | 2.74 |
| Ethyl 3-phenylpropiolate | 52.76 | 50.03 | 2.73 |
| Cinnamonitrile | 42.96 | 40.24 | 2.72 |
| trans-Geranyl bromide | 58.65 | 55.95 | 2.70 |
| 1,2-Bis(triethylsilyl)acetylene | 79.93 | 82.62 | -2.69 |
| 1-Butylthio-5,5-bis(ethoxy)-pent-1-en-3-yne | 73.95 | 71.27 | 2.68 |
| Cinnamic acid ethylester | 54.30 | 51.62 | 2.68 |
| Hydroxyacetaldehyde diethylacetal | 37.22 | 34.55 | 2.67 |
| Diethyl vinylphosphonate | 39.62 | 42.28 | -2.66 |
| Hexamethylbenzene | 52.72 | 55.38 | -2.66 |
| 4-Pentylbenzoyl chloride | 62.82 | 60.16 | 2.66 |
| s-trans-Butadiene | 22.69 | 20.04 | 2.65 |
| 2-Phenoxyvinyl diethoxy phosphorus oxide | 71.10 | 68.45 | 2.65 |
| 1-Chloroanthracene | 69.90 | 67.26 | 2.64 |
| 2,3-Dihydro-4H-1-benzopyran-4-one | 43.36 | 40.72 | 2.64 |
| 2,6-Diethylaniline | 52.09 | 49.45 | 2.64 |
| 1-Benzyl-3-(2-cyanoethyl)imidazolium thiocyanate | 75.18 | 77.79 | -2.61 |
| Ethyl 2,4-dioxopentanoate | 39.47 | 36.87 | 2.60 |
| N-Ethylcarbazole | 66.38 | 63.78 | 2.60 |
| Methyl phenylpropiolate | 47.95 | 45.37 | 2.58 |
| 1,2-Dibromo-1,1-dichloroethane | 39.24 | 36.67 | 2.57 |
| 2-Methoxyphenylisothiocyanate | 50.47 | 47.90 | 2.57 |
| 1,1-Difluoroethane | 13.83 | 11.28 | 2.55 |
| Dicyclohexylphosphine | 66.28 | 63.75 | 2.53 |
| 2-Methyl-3-phenyl-2-propenal | 48.13 | 45.60 | 2.53 |
| 1,2,4-Triazole | 17.50 | 14.98 | 2.52 |
| Phenyl butoxy 2-(butoxycarbonyl)ethyl phosphorus oxide | 86.28 | 88.79 | -2.51 |
| Cannabidiol | 94.93 | 97.43 | -2.50 |
| Benz[a]anthracene | 82.90 | 80.40 | 2.50 |
| Tris(2-ethylhexyl) trimellitate | 159.67 | 157.17 | 2.50 |
| Vitamin K1 | 143.28 | 140.79 | 2.49 |
| Cyclobutyrol | 51.72 | 49.23 | 2.49 |
| Maleic anhydride | 17.72 | 20.20 | -2.48 |
| Bis(2-hydroxyethyl)ammonium oleate | 115.82 | 113.36 | 2.46 |
| 4-Tolunitrile | 33.50 | 35.95 | -2.45 |
| Bis(diethylamino)bis(dipropylamino)silane | 113.74 | 116.19 | -2.45 |
| 7-H-Perfluoroheptyl methyl ether | 46.04 | 43.61 | 2.43 |
| 4-nitrodiphenyl ether | 62.31 | 59.88 | 2.43 |
| 1,3-Dioxolan-2-one | 19.31 | 21.73 | -2.42 |
| Acetic acid 2-hydroxyethylester | 26.22 | 23.80 | 2.42 |
| trans-1,3,5-Hexatriene | 31.55 | 29.14 | 2.41 |
| Bis(trifluoroacetyl)methane | 28.84 | 26.43 | 2.41 |
| Triphenylphosphane | 87.45 | 85.04 | 2.41 |
| 2-Methyl-5-isopropylaniline | 47.00 | 49.40 | -2.40 |
| 4-(1-Bromoethyl)-benzonitrile | 50.76 | 48.36 | 2.40 |
| 1-Ethyl-3-methylimidazolium 2-acryloamido-2-methylpropanesulfonate | 77.32 | 79.69 | -2.37 |
| Tri(butyl) ethylphosphonium diethylphosphate | 105.37 | 107.73 | -2.36 |
| beta-Bromocinnamaldehyde | 50.67 | 48.31 | 2.36 |
| 9H-Fluoren-9-one | 56.81 | 54.45 | 2.36 |
| Tetra-1-heptoxysilane | 142.72 | 145.06 | -2.34 |
| Spiro(2,2)pentane | 23.33 | 21.00 | 2.33 |
| 1-(2-Hydroxyethyl)-3-methylimidazolium bis(trifluoromethanesulfonyl) amide | 69.54 | 67.23 | 2.31 |
| 1,3,5-Tri-t-butylbenzene | 80.22 | 82.53 | -2.31 |
| Phenyl butoxy 2-(butoxycarbonyl)propyl phosphorus oxide | 91.07 | 93.37 | -2.30 |
| Diethyl oxobutanedioate | 45.24 | 42.94 | 2.30 |
| 1,4-Diiodobenzene | 49.38 | 51.68 | -2.30 |
| Phenyltrichlorosilylacetylene | 58.54 | 56.24 | 2.30 |
| Antimalarine | 91.20 | 88.90 | 2.30 |
| 6-t-Butyl-2,4-dimethylphenol | 58.94 | 56.65 | 2.29 |
| 4-Aminophenylacetate | 44.17 | 41.88 | 2.29 |
| Tetra(1H,1H,7H-perfluoroheptyl)silicate | 149.98 | 152.26 | -2.28 |
| Trihexyl tetradecyl phosphonium acetate | 173.57 | 171.29 | 2.28 |
| Coronene | 110.04 | 107.76 | 2.28 |
| Potasan | 85.31 | 83.05 | 2.26 |
| (2-Methoxyvinyl)benzene | 43.98 | 41.72 | 2.26 |
| Hexadecanoic anhydride | 154.37 | 152.12 | 2.25 |
| 1-(2-Hydroxyethyl)-3-methylimidazolium perfluorobutanesulfonate | 63.29 | 65.53 | -2.24 |
| Chloropentafluorobenzene | 33.07 | 30.84 | 2.23 |
| Phenylisothiocyanate | 43.58 | 41.35 | 2.23 |
| 2-Methylpropane | 22.80 | 20.59 | 2.21 |
| 9-Methylanthracene | 69.46 | 67.25 | 2.21 |
| 4-t-Butylbenzenemethanol | 53.62 | 51.42 | 2.20 |
| Bis-N-(2-hydroxypropyl)-2-furfurylamine | 56.20 | 58.40 | -2.20 |
| Ethyl 2-benzylidene-2-cyanoacetate | 53.73 | 55.92 | -2.19 |
| Methyl sorbate | 38.11 | 35.92 | 2.19 |
| N,N-Diisopropylethanolamine | 46.50 | 44.32 | 2.18 |
| Acetaldol | 20.37 | 22.55 | -2.18 |
| 1,3-Butadien-1-ol acetate | 33.04 | 30.86 | 2.18 |
| 2-(Bromomethoxy)propane | 29.09 | 31.27 | -2.18 |
| Bis(trihexyl)siloxane | 189.57 | 187.40 | 2.17 |
| 9-Methyl-9H-fluorene | 60.89 | 58.73 | 2.16 |
| 9-H-Perfluorononyl butyrate | 69.74 | 67.58 | 2.16 |
| 5-Methoxy-2-methylindole | 51.61 | 49.45 | 2.16 |
| 2-Butylthiovinyl dihexoxy phosphorus oxide | 103.28 | 105.43 | -2.15 |
| 1-Phenyl-2-pentyl-3,5-dimethylpyrazolium tetrafluoroborate | 79.59 | 77.44 | 2.15 |
| n-Undecanal | 55.68 | 53.54 | 2.14 |
| 3-Acetyl-6-methylpyridine | 41.08 | 38.94 | 2.14 |
| 4-Cyclohexylcyclohexyl acrylate | 70.80 | 68.67 | 2.13 |
| Hexachlorobenzene | 53.31 | 55.44 | -2.13 |
| 3-Cyclohexyl-2-methylnonane | 71.81 | 73.93 | -2.12 |
| Triethyl-2-phenoxyethylsilane | 72.79 | 74.91 | -2.12 |
| Ethyl sorbate | 42.69 | 40.58 | 2.11 |
| n-Butylstearate | 103.61 | 105.72 | -2.11 |
| Ethyl trichloromethyl ether | 34.31 | 32.21 | 2.10 |
| Methyl 2-(methylamino)benzoate | 48.76 | 46.66 | 2.10 |
| 4-t-Butyl-2,5-dimethylphenol | 58.75 | 56.65 | 2.10 |
| Cinnamoylchloride | 48.03 | 45.93 | 2.10 |
| 1,4,5-Trimethyltetrahydro-8-naphthol | 61.24 | 59.14 | 2.10 |
| 6-Nitro-9-oxaphenanthren-10-one | 64.81 | 62.72 | 2.09 |
| Tri-o-cresylphosphate | 99.27 | 101.35 | -2.08 |
| 2-Bromo-1,4-dimethoxybenzene | 49.29 | 47.21 | 2.08 |
| 2-Fluoroethylsulfonyl fluoride | 23.02 | 20.95 | 2.07 |
| 2-Oxobutyric acid | 20.50 | 22.57 | -2.07 |
| 3-(Phenylmethylene)-2-pentanone | 56.73 | 54.67 | 2.06 |
| 2,6-Dimethylhepta-2,5-dien-4-one | 45.92 | 43.87 | 2.05 |
| 1,4-Di-t-butylbenzene | 61.81 | 63.86 | -2.05 |
| 2-Acetylcyclopentanone | 35.00 | 32.96 | 2.04 |
| Benzamide | 32.44 | 34.47 | -2.03 |
| cis-Cyclohexane-1,2-dinitrite | 42.04 | 40.02 | 2.02 |
| 4-Methoxyphenyldipropylphosphine | 73.12 | 71.11 | 2.01 |
| S-Methyl thioacetate | 26.05 | 24.04 | 2.01 |
| Tri-sec-butoxymethane | 69.40 | 67.40 | 2.00 |
| 4-Vinylaniline | 41.71 | 39.71 | 2.00 |
| Dibenzofuran | 53.42 | 51.42 | 2.00 |
| 1-Aziridineethanol | 21.77 | 23.76 | -1.99 |
| Benzenecarbothioic acid | 37.13 | 39.11 | -1.98 |
| Monoacetin | 27.89 | 29.85 | -1.96 |
| 2,6-Di-t-pentyl-4-methylphenol | 77.81 | 79.77 | -1.96 |
| N-Benzyl-N-ethylaniline | 71.66 | 69.71 | 1.95 |
| 1-Bromo-4-t-butylbenzene | 54.73 | 52.78 | 1.95 |
| Methyl 3-bromopropanoate | 32.04 | 30.10 | 1.94 |
| Glycerol trioleate | 268.81 | 270.75 | -1.94 |
| Forstab | 100.03 | 98.09 | 1.94 |
| Diphenylsulfone | 62.21 | 60.27 | 1.94 |
| 2,3-Dimethylquinoxaline | 47.17 | 49.10 | -1.93 |
| Pentafluorobenzonitrile | 32.57 | 30.64 | 1.93 |
| Isobutylphosphinic dichloride | 37.98 | 39.91 | -1.93 |
| 1-Butyl-3-methylimidazolium L-alanine | 63.81 | 61.89 | 1.92 |
| 2,4-Dichloroaniline | 38.29 | 40.21 | -1.92 |
| 9,9'-Bifluorenyl | 108.00 | 106.08 | 1.92 |
| 2-Fluorobenzeneacetonitrile | 37.59 | 35.67 | 1.92 |
| N-Pentylpyridinium trifluoroacetate | 58.06 | 59.98 | -1.92 |
| 2-Phenoxyvinyl dimethoxy phosphorus oxide | 61.05 | 59.13 | 1.92 |
| Cinoxate | 70.86 | 68.95 | 1.91 |
| Cyclopropane | 15.79 | 13.89 | 1.90 |
| 2-(Phenylmethylene)butanal | 52.12 | 50.23 | 1.89 |
| 2-Fluorophenol | 30.15 | 28.26 | 1.89 |
| Bromoacetylene | 18.64 | 16.76 | 1.88 |
| 1,4-Butanediamine | 29.41 | 27.54 | 1.87 |
| 1-Cyano-1,3-butadiene | 26.49 | 24.62 | 1.87 |
| Dichloroethylmethylsilane | 36.02 | 34.16 | 1.86 |
| 4-Hydroxybenzaldehyde | 35.52 | 33.66 | 1.86 |
| N-Methylmorpholinium formate | 35.24 | 37.10 | -1.86 |
| EPN | 86.83 | 84.97 | 1.86 |
| Tartaric acid | 24.89 | 26.74 | -1.85 |
| 1,2-Diiodotetrafluoroethane | 38.87 | 37.02 | 1.85 |
| 1-Butoxy-5,5-bis(ethoxy)-pent-1-en-3-yne | 66.99 | 65.14 | 1.85 |
| Tri-m-cresylphosphate | 103.19 | 101.35 | 1.84 |
| Perfluoroisoprene | 25.97 | 24.13 | 1.84 |
| 1,3-Benzodioxole-5-ethanamine | 43.73 | 45.56 | -1.83 |
| 1,2-Dinitrobenzene | 41.74 | 39.92 | 1.82 |
| Perfluoro-n-octane | 43.81 | 42.00 | 1.81 |
| Tetradecoxysilane | 198.82 | 200.62 | -1.80 |
| Benzylaniline | 61.84 | 60.04 | 1.80 |
| 2-Isopropoxyvinyl diethoxy phosphorus oxide | 59.43 | 57.63 | 1.80 |
| cis-3-Phenyl-2-propenenitrile | 42.03 | 40.24 | 1.79 |
| Ethylcarbamate | 22.59 | 20.81 | 1.78 |
| N,N-Dimethyl-2-naphthylamine | 60.34 | 58.56 | 1.78 |
| 1,3-Diphenyl-2-buten-1-one | 71.77 | 69.99 | 1.78 |
| Acetylacetone | 27.65 | 25.87 | 1.78 |
| Isobutylene | 22.16 | 20.39 | 1.77 |
| 4,4'-Dibromodiphenyl ether | 70.13 | 68.36 | 1.77 |
| Bolecic acid | 85.44 | 83.67 | 1.77 |
| s-cis-Butadiene | 21.80 | 20.04 | 1.76 |
| s-trans-1,3-Butadiene | 21.80 | 20.04 | 1.76 |
| Hexyl ethoxy dithiophosphinic acid | 63.48 | 65.23 | -1.75 |
| Ethyl 2-bromovalerate | 45.80 | 44.05 | 1.75 |
| 2-Ethoxycarbonylaniline | 48.13 | 46.38 | 1.75 |
| trans-1,3-Butadienylbenzene | 46.50 | 44.76 | 1.74 |
| N,N-Diethyldodecanamide | 81.75 | 80.01 | 1.74 |
| 9-Chloroanthracene | 69.00 | 67.26 | 1.74 |
| 2-Vinyl-5-norbornene | 40.67 | 38.94 | 1.73 |
| 3,4,5-Trimethoxybenzyl alcohol | 50.67 | 52.40 | -1.73 |
| 2-Ethoxyvinyl dimethoxy phosphorus oxide | 45.41 | 43.68 | 1.73 |
| 4-Methoxybenzaldehyde | 40.09 | 38.37 | 1.72 |
| Ethoxyquin | 69.39 | 67.68 | 1.71 |
| 4-Nitroaniline | 35.57 | 37.27 | -1.70 |
| 2-Phenylvinyl bis(dimethylamino) phosphorus oxide | 71.90 | 70.20 | 1.70 |
| Divinylacetylene | 29.44 | 27.74 | 1.70 |
| Nitroethylene | 15.40 | 17.10 | -1.70 |
| 9,10-Dihydrophenanthrene | 60.48 | 58.78 | 1.70 |
| N-(2-Hydroxyethyl)-bis(2-furfuryl)amine | 58.60 | 60.30 | -1.70 |
| Tri(1,2-bis(ethoxycarbonyl)ethoxy)borine | 130.83 | 132.53 | -1.70 |
| Dicyclohexylketone | 56.58 | 58.27 | -1.69 |
| 2,4,6-Cycloheptatrien-1-one | 33.92 | 32.23 | 1.69 |
| Tributylsilylaminotriethylsilane | 104.73 | 106.42 | -1.69 |
| Dimethyldi(2-ethylhexoxy)silane | 94.80 | 96.49 | -1.69 |
| 4-Fluoroaniline | 28.79 | 30.47 | -1.68 |
| 1,2,3,5-Tetrafluorobenzene | 27.80 | 26.12 | 1.68 |
| Triphenylethylene | 86.69 | 85.01 | 1.68 |
| Hexanamide | 34.71 | 33.04 | 1.67 |
| 2-Ethoxyvinyl diethoxy phosphorus oxide | 54.67 | 53.00 | 1.67 |
| Sulfuric acid | 13.51 | 15.17 | -1.66 |
| sec-Butylstyrene | 55.97 | 54.31 | 1.66 |
| (-)-Globulol | 67.93 | 66.28 | 1.65 |
| Tetracyanoethylene | 30.73 | 29.08 | 1.65 |
| Stearic acid anhydride | 172.28 | 170.64 | 1.64 |
| N-Propylpyridinium trifluoroacetate | 52.36 | 50.72 | 1.64 |
| p-Anisylchloride | 45.02 | 43.38 | 1.64 |
| 1-Methoxy-1,3-butadiene | 27.74 | 26.10 | 1.64 |
| 2-Isopropoxyvinyl bis(diethylamino) phosphorus oxide | 77.53 | 79.15 | -1.62 |
| Anethole | 48.60 | 46.98 | 1.62 |
| Saccharose | 67.70 | 69.32 | -1.62 |
| Sanger's Reagent | 41.43 | 39.82 | 1.61 |
| Octafluoroanisole | 33.75 | 32.14 | 1.61 |
| Dimethyldi-2-heptoxysilane | 85.72 | 87.33 | -1.61 |
| 1-(2-Phenylethoxy)-5,5-bis(ethoxy)-pent-1-en-3-yne | 82.06 | 80.46 | 1.60 |
| 1,2,3,4,5,6,7,8-Octahydrophenanthrene | 58.44 | 60.04 | -1.60 |
| beta-Ionone | 61.84 | 60.24 | 1.60 |
| N-(2-Hydroxypropyl)-bis(2-furfuryl)amine | 63.34 | 64.93 | -1.59 |
| iso-Pentyl 4-methylpentoxy dithiophosphinic acid | 80.61 | 79.02 | 1.59 |
| 2-Nitrobenzeneethanol | 45.67 | 44.08 | 1.59 |
| Triethylene glycol dimethacrylate | 71.75 | 73.34 | -1.59 |
| Propyldichlorophosphine | 33.74 | 35.33 | -1.59 |
| 6,6-Dimethylfulvene | 38.24 | 36.66 | 1.58 |
| 4-t-Amylstyrene | 60.53 | 58.96 | 1.57 |
| trans-(3-Chloro-1-propenyl)benzene | 46.82 | 45.25 | 1.57 |
| Tripropylsilanol | 55.59 | 54.03 | 1.56 |
| N,N-Dimethyl-2-nitroaniline | 48.86 | 47.30 | 1.56 |
| 1,3-Divinylbenzene | 46.36 | 44.80 | 1.56 |
| Propyne | 15.51 | 13.96 | 1.55 |
| Quinine | 93.86 | 95.40 | -1.54 |
| 2-Acetylcyclohexanone | 39.13 | 37.59 | 1.54 |
| N,N-Diethyl-2-methylaniline | 53.04 | 54.57 | -1.53 |
| Ethyl 4,4,4-trifluoroacetoacetate | 33.75 | 32.22 | 1.53 |
| Bis(trifluoroacetyl)methane (enol form) | 28.84 | 27.31 | 1.53 |
| Diheptyl terephthalate | 105.99 | 104.46 | 1.53 |
| trans-2-Butenedinitrile | 21.63 | 20.10 | 1.53 |
| 2-Phenoxypropionic acid | 42.47 | 43.99 | -1.52 |
| Benzenesulfinylchloride | 39.52 | 41.04 | -1.52 |
| (Ethoxy fluoro oxophosphorus) (bis(diethylamino) oxophosphorus) oxide | 74.30 | 72.78 | 1.52 |
| 4-(4-Bromophenoxy)toluene | 67.10 | 65.58 | 1.52 |
| 1-Methoxy-4-trifluoromethoxy-2,3,5,6-tetrafluorobenzene | 40.30 | 38.79 | 1.51 |
| Acetylisothiocyanate | 26.81 | 25.30 | 1.51 |
| 2-Methyl-7,8-benzoquinoline | 63.25 | 64.75 | -1.50 |
| 2,5-Norbornadiene | 28.37 | 29.87 | -1.50 |
| 2-Nitro-m-xylene | 41.34 | 42.84 | -1.50 |
| 1-Pent-4-enylphosphine | 33.47 | 34.97 | -1.50 |
| 1,2-Dimethyl-4-nitrobenzene | 41.34 | 42.84 | -1.50 |
| 2-Isopropoxyvinyl dimethoxy phosphorus oxide | 49.81 | 48.31 | 1.50 |
| 3,5-Diethoxy-5-methylhexanal | 49.07 | 47.57 | 1.50 |
| trans,cis-2,4-Hexadiene | 31.08 | 29.58 | 1.50 |
| Glycerol trinitrate | 40.39 | 38.90 | 1.49 |
| N-(2-Furfuryl)thiomorpholine | 50.61 | 52.10 | -1.49 |
| 1-Ethyl-5-methylpyrazole | 31.53 | 33.02 | -1.49 |
| Ethyl cyclohexanecarboxylate | 44.85 | 43.36 | 1.49 |
| 2-Isobutenylfuran | 39.06 | 37.57 | 1.49 |
| 1-Fluoro-3-isothiocyanatobenzene | 42.29 | 40.80 | 1.49 |
| Ethoxyacetylene | 22.08 | 20.59 | 1.49 |
| 2,N,N-Trimethylaniline | 43.92 | 45.41 | -1.49 |
| 2,N,N-Trimethylaniline | 43.92 | 45.41 | -1.49 |
| N-Hexylpyridinium bis(trifluoromethanesulfonyl) amide | 84.06 | 85.55 | -1.49 |
| 1-Benzyl-3-methylimidazolium chloride | 58.45 | 59.94 | -1.49 |
| L-Proline 2-methylpropyl ester dodecyl sulfate | 116.75 | 115.26 | 1.49 |
| Chloromethyldiphenylsilane | 68.14 | 69.62 | -1.48 |
| L-Valine 2-methylpropyl ester dodecyl sulfate | 118.59 | 117.11 | 1.48 |
| Propyl 4-hydroxybenzoate | 50.28 | 48.80 | 1.48 |
| Benzylazide | 38.58 | 40.06 | -1.48 |
| cis-Stilbene | 61.86 | 60.38 | 1.48 |
| 1-Methoxy-1-buten-3-yne | 25.83 | 24.35 | 1.48 |
| 1,1,2,2-Tetrafluoroethoxycyclohexane | 40.68 | 39.20 | 1.48 |
| Cyclooctanamine | 38.98 | 40.45 | -1.47 |
| alpha-Farnesene | 69.47 | 70.94 | -1.47 |
| 1,3-Dihydroxybenzene | 28.74 | 30.20 | -1.46 |
| 1-(1-Methyl-1H-pyrrol-2-yl)ethanone | 37.01 | 35.55 | 1.46 |
| 4-Acetylphenol | 39.56 | 38.10 | 1.46 |
| 1-Benzyl-3-methylimidazolium methylsulfate | 67.84 | 69.30 | -1.46 |
| Methyltripropoxysilane | 61.92 | 60.47 | 1.45 |
| 1,2-Divinylbenzene | 46.25 | 44.80 | 1.45 |
| 2-Phenyl-2-propanol | 43.39 | 41.94 | 1.45 |
| 4-Bromoaniline | 36.71 | 38.16 | -1.45 |
| Bis(dimethylamino)borane | 31.63 | 33.07 | -1.44 |
| 4-Methyl-1,3-pentadiene | 30.93 | 29.49 | 1.44 |
| 1-Vinyl-4-methoxybenzene | 43.65 | 42.21 | 1.44 |
| 1-Vinyl-3-methoxybenzene | 43.65 | 42.21 | 1.44 |
| Coumatetralyl | 84.30 | 82.86 | 1.44 |
| Butyl oleate | 104.13 | 105.56 | -1.43 |
| Bromomethylacetate | 25.24 | 26.67 | -1.43 |
| 1-Allyl-3-(2-cyanoethyl)imidazolium thiocyanate | 60.96 | 62.39 | -1.43 |
| Methyl trioctylammonium bis(trifluoromethylsulfonyl)amide | 154.51 | 153.08 | 1.43 |
| Isoheptyl methoxy dithiophosphinic acid | 63.84 | 65.26 | -1.42 |
| 4,4-Diethoxy-1-butanamine | 44.42 | 45.84 | -1.42 |
| trans-Piperylene | 26.23 | 24.81 | 1.42 |
| 2,3'-Bipyridine | 48.27 | 46.85 | 1.42 |
| trans-2-Methoxy-4-(1-propenyI)phenol | 50.24 | 48.82 | 1.42 |
| Dichloroacetylene | 19.36 | 20.78 | -1.42 |
| Methyl 2-aminobenzoate | 43.13 | 41.72 | 1.41 |
| 2-(1-Pentenyl)furan | 43.70 | 42.29 | 1.41 |
| Cumulene | 17.25 | 15.84 | 1.41 |
| 1-Butyne | 20.00 | 18.59 | 1.41 |
| Methylparathion | 60.50 | 61.91 | -1.41 |
| 9-Bromoanthracene | 71.44 | 70.03 | 1.41 |
| Octadecanenitrile | 83.86 | 85.27 | -1.41 |
| 1,5-Dimethylpyrazole | 27.04 | 28.44 | -1.40 |
| N-Methyl-p-toluidine | 41.72 | 40.32 | 1.40 |
| Tritetralin | 75.40 | 76.80 | -1.40 |
| Phenylphosphonic dichloride | 45.88 | 44.49 | 1.39 |
| Tetrabutylphosphonium butyrate | 105.08 | 106.47 | -1.39 |
| 2-Hydroxypropylmethacrylate | 36.05 | 37.44 | -1.39 |
| Isosafrol | 47.97 | 46.58 | 1.39 |
| 1-Hexadecanol | 76.24 | 77.62 | -1.38 |
| 3-Chloronitrobenzene | 36.66 | 38.04 | -1.38 |
| 1,2-Diphenylethane | 59.16 | 60.54 | -1.38 |
| Biphenyl | 49.90 | 51.28 | -1.38 |
| 1,2-Diiodoethane | 38.54 | 37.16 | 1.38 |
| Diethylmethyl 1-isobutoxyethoxysilane | 66.14 | 64.76 | 1.38 |
| Diethyleneglycol dimethacrylate | 60.99 | 62.37 | -1.38 |
| 1,2-Dimethoxy-4-(1-propenyl)benzene | 54.91 | 53.53 | 1.38 |
| 1-(Chloromethyl)-4-methoxybenzene | 41.33 | 42.70 | -1.37 |
| Panthenol | 50.05 | 51.42 | -1.37 |
| 1,10-Dibromodecane | 65.29 | 63.92 | 1.37 |
| N,N-Diethylcarbamic acid | 32.00 | 30.63 | 1.37 |
| Julolidine | 56.51 | 55.14 | 1.37 |
| Methyldichloroisobutoxysilane | 43.20 | 44.57 | -1.37 |
| Diphenylsulfoxide | 61.40 | 60.04 | 1.36 |
| Diethyl acetylenedicarboxylate | 42.44 | 41.08 | 1.36 |
| Dimethyl pimelate | 45.85 | 47.21 | -1.36 |
| Quinoxaline | 40.50 | 39.14 | 1.36 |
| 4-Methoxy-1,1'-biphenyl | 59.18 | 57.83 | 1.35 |
| 1-n-Propylimidazole | 31.28 | 32.63 | -1.35 |
| 2-Phenylfuran | 45.05 | 43.70 | 1.35 |
| Tridecanoic acid | 65.28 | 63.94 | 1.34 |
| 1-(2-Hydroxyethyl)-3-(2-cyanoethyl)imidazolium thiocyanate | 60.35 | 59.01 | 1.34 |
| 1-Chloro-2-methyl-1-butene | 28.50 | 29.84 | -1.34 |
| 5-Methylfurfural | 30.55 | 29.21 | 1.34 |
| 4-Methylpentyl ethoxy dithiophosphinic acid | 63.85 | 65.18 | -1.33 |
| 2-(Vinyloxy)ethanol | 24.41 | 23.08 | 1.33 |
| 2-Iodobiphenyl | 65.19 | 63.86 | 1.33 |
| trans-1-Propenylbenzene | 41.76 | 40.43 | 1.33 |
| 2,3,4,5-Tetramethylpyrrole | 41.21 | 39.88 | 1.33 |
| Tetra(2,2-diethylhydrazino)silane | 114.23 | 112.91 | 1.32 |
| sec-Hexyl acetate | 39.53 | 40.85 | -1.32 |
| cis-1,3,5-Hexatriene | 30.46 | 29.14 | 1.32 |
| Isopropenylacetylene | 24.29 | 22.97 | 1.32 |
| Dichloro(4-ethylphenyl)phosphine | 56.02 | 54.70 | 1.32 |
| Phenethyl acetate | 45.65 | 46.96 | -1.31 |
| Ethylphenylsilanol | 47.88 | 46.57 | 1.31 |
| 3-Methyl-1,3-butanediol | 29.35 | 28.04 | 1.31 |
| beta-Irone | 66.08 | 64.77 | 1.31 |
| Isoindole | 38.60 | 37.29 | 1.31 |
| 1-Ethyl-3-methylimidazolium hydrogen sulfate | 44.57 | 45.88 | -1.31 |
| 1,2-Dichloro-1-ethoxyethane | 33.38 | 32.08 | 1.30 |
| 1,6-Hexanedial | 29.70 | 31.00 | -1.30 |
| 2-Ethylpyrrole | 31.77 | 30.47 | 1.30 |
| 1,3,5-Tris(3-methoxypropyl)borazine | 83.61 | 84.90 | -1.29 |
| 3,5-Dichloroaniline | 41.50 | 40.21 | 1.29 |
| 3-Methylbutanoic anhydride | 48.87 | 50.16 | -1.29 |
| Ethyl N,N-diethylamino phosphorusoxy fluoride | 41.53 | 40.24 | 1.29 |
| Acetoacetic acid ethylester Enolform | 34.11 | 32.82 | 1.29 |
| Phenothrin | 104.96 | 103.67 | 1.29 |
| 1-(2-Cyanoethyl)-3-octylimidazolium bis(2-ethylhexyl)sulfosuccinate | 175.77 | 177.06 | -1.29 |
| Tricyclene | 40.57 | 41.85 | -1.28 |
| Isobornyl thiocyanoacetate | 66.31 | 67.59 | -1.28 |
| p-Isopropenylstyrene | 50.76 | 49.48 | 1.28 |
| 1,2-Dihydroxybenzene | 31.48 | 30.2 | 1.28 |
| cis,cis-2,4-Hexadiene | 30.86 | 29.58 | 1.28 |
| 1-Vinylnaphthalene | 52.40 | 53.68 | -1.28 |
| Butylisobutylether | 42.08 | 40.80 | 1.28 |
| Ethyl benzoylacetate | 53.15 | 51.87 | 1.28 |
| 1,1-Dichlorotetrafluoroethane | 22.58 | 21.30 | 1.28 |
| 5-Methyl-1-phenyl-1-hexen-3-one | 60.48 | 59.20 | 1.28 |
| Glycerol tripalmitate | 242.2 | 243.47 | -1.27 |
| Aramite | 87.62 | 86.35 | 1.27 |
| 1,1-Diphenyl-1-propene | 63.79 | 65.06 | -1.27 |
| 2,5-Dimethyl-2,4-hexadiene | 40.21 | 38.94 | 1.27 |
| 2-Phenylpyridine | 50.39 | 49.12 | 1.27 |
| 4-Methoxyacetophenone | 44.02 | 42.75 | 1.27 |
| 1,1,1,2,2,3,3-Heptafluorobutane | 22.95 | 21.68 | 1.27 |
| Furoylchloride | 30.50 | 29.23 | 1.27 |
| Naphthalene | 43.21 | 44.48 | -1.27 |
| 1,5-Cyclooctadiene | 35.45 | 36.72 | -1.27 |
| Tetra-2-ethyl-1-hexoxysilane | 162.11 | 163.38 | -1.27 |
| Fluorosulfonylbenzene | 35.05 | 36.31 | -1.26 |
| 9-Heptyl-9-heptadecanol | 113.35 | 114.61 | -1.26 |
| N,N-Dimethyltrichloroacetamide | 40.42 | 39.16 | 1.26 |
| cis-1,3-Hexadiene | 30.66 | 29.40 | 1.26 |
| N-Ethyl-3-methylaniline | 46.16 | 44.90 | 1.26 |
| 4-Mercaptophenol | 35.10 | 36.36 | -1.26 |
| 1,2-Dichlorotetrafluoroethane | 22.58 | 21.32 | 1.26 |
| Paraoxon | 64.85 | 63.60 | 1.25 |
| 2-Hydroxybenzoyl chloride | 39.81 | 38.57 | 1.24 |
| Phenylhydrazine | 34.06 | not evaluable |  |
| Malathion | 77.17 | not evaluable |  |
| N-(Diethylaminothiocarbonyl)-N',N'-diethylbenzamidine | 91.29 | not evaluable |  |
| 2-Pyrazoline | 19.51 | not evaluable |  |
| Chlorotrifluoroethylene | 17.52 | not evaluable |  |
| 1-Butyl-3-methylimidazolium iodide | 58.90 | not evaluable |  |
| 1-Hexyl-3-methylimidazolium iodide | 67.74 | not evaluable |  |
