# Supplementary material for: Revision and Extension of a Generally Applicable Group-Additivity Method for the Calculation of the Refractivity and Polarizability of Organic Molecules
Source: Preprints.org preprint supplement (doi:10.20944/preprints202208.0543.v1), 2022-08-31
Supplement: Supplementary file 5 [file S09. Polarizability outliers.doc]

| **Molecule name** | **Polarizability exp** | **Polarizability calc** | **Deviation** | **Dev. in %** |
| --- | --- | --- | --- | --- |
| 2-Methylindole | 17.35 | 16.85 | 0.50 | 2.88 |
| (Methoxymethyl)oxirane | 9.16 | 8.67 | 0.49 | 5.35 |
| 1-Bromo-4-vinylbenzene | 17.62 | 17.14 | 0.48 | 2.72 |
| cis-2-Methoxy-4-(1-propenyl)phenol | 19.78 | 19.30 | 0.48 | 2.43 |
| Isobutyl butyrate | 16.69 | 16.21 | 0.48 | 2.88 |
| Isopropyl salicylate | 19.80 | 19.32 | 0.48 | 2.42 |
| alpha-Ionone | 24.28 | 23.81 | 0.47 | 1.94 |
| 3-Chlorocrotonic acid | 11.12 | 10.65 | 0.47 | 4.23 |
| cis-2-Methyl-1,3-pentadiene | 12.16 | 11.69 | 0.47 | 3.87 |
| 1-Chloro-3-(1-methylethoxy)-2-propanol | 14.53 | 15.00 | -0.47 | -3.23 |
| 2-Formylnaphthalene | 20.21 | 19.74 | 0.47 | 2.33 |
| Ethyl 4-methoxybenzoate | 19.84 | 19.37 | 0.47 | 2.37 |
| 2-Vinylfuran | 11.60 | 11.13 | 0.47 | 4.05 |
| (trans-2-Bromovinyl)benzene | 17.62 | 17.16 | 0.46 | 2.61 |
| (3-Chloropropyl)benzene | 17.53 | 17.99 | -0.46 | -2.62 |
| 4-Hydroxy-2-butanone | 9.32 | 8.86 | 0.46 | 4.94 |
| Isobutyl salicylate | 21.60 | 21.14 | 0.46 | 2.13 |
| Isopropyl trifluoroacetate | 11.29 | 10.83 | 0.46 | 4.07 |
| Diethyl ketomalonate | 15.65 | 15.19 | 0.46 | 2.94 |
| Sorbic alcohol | 12.72 | 12.26 | 0.46 | 3.62 |
| 2-Hydroxy-5-methylbenzaldehyde | 15.69 | 15.23 | 0.46 | 2.93 |
| Furfural | 10.08 | 9.62 | 0.46 | 4.56 |
| Ethyl salicylate | 17.95 | 17.49 | 0.46 | 2.56 |
