# Supplementary material for: Revision and Extension of a Generally Applicable Group-Additivity Method for the Calculation of the Refractivity and Polarizability of Organic Molecules
Source: Preprints.org preprint supplement (doi:10.20944/preprints202208.0543.v1), 2022-08-31
Supplement: Supplementary file 6 [file Table 1.doc]

| **No** | **Atom Type** | **Neighbours** | **Meaning** | **Example** |
| --- | --- | --- | --- | --- |
| 1 | B | HN2 | H**B**N2 | Bis(butylamino)borane |
| 7 | B | CO2 | C**B**O2 | Phenyl dimethoxyborine |
| 21 | B | O3 | **B**O3 | Triethoxyborine |
| 25 | B(-) | C4 | **B**C4- | tetracyanoborate |
| 152 | C(-) sp3 | C3 | C-**C**-(C)-C | tricyanomethanide |
| 245 | C aromatic | H:C:N(+) | C:**C**H:N+ | C2 in pyridinium |
| 272 | C(+) aromatic | H:N2 | N:**C**+(H):N | C2 in imidazolium |
| 280 | C sp | C#N(-) | N#**C**-C- | tricyanomethanide |
| 290 | C sp | N#N(-) | N#**C**-N- | dicyanoamide |
| 295 | C sp | =N=S(-) | N=**C**=S- | Thiocyanate |
| 316 | N sp3 | HSi2 | H**N**Si2 | Bis(trimethoxysilyl)amine |
| 352 | N(+) sp3 | C4 | **N**C4+ | tetraalkylammonium |
| 359 | N(+) sp2 | O2=O(-) | **N**O3- | nitrate |
| 363 | N aromatic | C2:C(+) | C-**N**(C):C+ | N1 in 1-alkylimidazolium |
| 365 | N(+) aromatic | C:C2 | C:**N**+(C):C | N in 1-alkylpyridinium |
| 370 | N(-) | C2 | C-**N**--C | dicyanoamide |
| 398 | O | CSi | C**O**Si | Bis(trimethoxysilyl)amine |
| 502 | S4 | CO=O2(-) | C-**S**O3- | Methylsulfonate |
| 512 | S4 | O2=O2(-) | **S**O4- | hydrosulfate |
| 533 | Si | C3O | C3**Si**O | Methoxytrimethylsilane |
| 539 | Si | C2N2 | C2**Si**N2 | Diethyldiisothiocyanatosilane |
| 554 | Si | NO3 | N**Si**O3 | Bis(trimethoxysilyl)amine |
