# Supplementary material for: Revision and Extension of a Generally Applicable Group-Additivity Method for the Calculation of the Refractivity and Polarizability of Organic Molecules
Source: Preprints.org preprint supplement (doi:10.20944/preprints202208.0543.v1), 2022-08-31
Supplement: Supplementary file 7 [file Table 2.doc]

| **Entry** | **Atom Type** | **Neighbours** | **Contribution** | **Occurrences** | **Molecules** |
| --- | --- | --- | --- | --- | --- |
| 1 | B | HN2 | 39.13 | 15 | 11 |
| 2 | B | HNS | 46.42 | 2 | 2 |
| 3 | B | HO2 | 28.1 | 1 | 1 |
| 4 | B | HS2 | 52.49 | 5 | 5 |
| 5 | B | C3 | 66.64 | 4 | 4 |
| 6 | B | C2N | 62.25 | 8 | 8 |
| 7 | B | C2O | 64.24 | 22 | 15 |
| 8 | B | C2S | 69.73 | 10 | 10 |
| 9 | B | CN2 | 58.53 | 2 | 2 |
| 10 | B | CNO | 59.28 | 1 | 1 |
| 11 | B | CNS | 65.63 | 1 | 1 |
| 12 | B | CO2 | 61.69 | 31 | 26 |
| 13 | B | COCl | 48.7 | 4 | 4 |
| 14 | B | CS2 | 72.57 | 8 | 8 |
| 15 | B | CSCl | 53.86 | 2 | 2 |
| 16 | B | CSBr | 56.93 | 4 | 4 |
| 17 | B | CCl2 | 36.22 | 8 | 6 |
| 18 | B | N3 | 54.93 | 4 | 2 |
| 19 | B | N2O | 56.24 | 4 | 2 |
| 20 | B | NO2 | 58.3 | 1 | 1 |
| 21 | B | O3 | 59.3 | 21 | 21 |
| 22 | B | O2Cl | 46.04 | 8 | 8 |
| 23 | B | OCl2 | 33.44 | 6 | 6 |
| 24 | B | S3 | 75.69 | 3 | 3 |
| 25 | B(-) | C4 | 74.59 | 5 | 5 |
| 26 | B(-) | O2F2 | 63.86 | 4 | 4 |
| 27 | B(-) | F4 | -2.41 | 18 | 18 |
| 28 | C sp3 | H3C | 5.7 | 9421 | 4296 |
| 29 | C sp3 | H3C(+) | 58.97 | 3 | 3 |
| 30 | C sp3 | H3N | 12.24 | 387 | 246 |
| 31 | C sp3 | H3N(+) | 19.98 | 76 | 55 |
| 32 | C sp3 | H3O | 11.65 | 505 | 359 |
| 33 | C sp3 | H3S | 11.49 | 79 | 55 |
| 34 | C sp3 | H3S(+) | 16.94 | 2 | 2 |
| 35 | C sp3 | H3P | 14.04 | 17 | 16 |
| 36 | C sp3 | H3P(+) | 11.23 | 2 | 2 |
| 37 | C sp3 | H3Si | 10.79 | 626 | 180 |
| 38 | C sp3 | H2BC | -16.41 | 97 | 53 |
| 39 | C sp3 | H2C2 | 4.63 | 15752 | 3454 |
| 40 | C sp3 | H2CN | 11.13 | 1078 | 561 |
| 41 | C sp3 | H2CN(+) | 18.6 | 223 | 129 |
| 42 | C sp3 | H2CO | 10.61 | 2562 | 1560 |
| 43 | C sp3 | H2CS | 10.63 | 395 | 253 |
| 44 | C sp3 | H2CS(+) | 15.8 | 13 | 5 |
| 45 | C sp3 | H2CP | 12.84 | 239 | 171 |
| 46 | C sp3 | H2CP(+) | 12.03 | 46 | 12 |
| 47 | C sp3 | H2CF | 5.62 | 33 | 28 |
| 48 | C sp3 | H2CCl | 10.5 | 229 | 190 |
| 49 | C sp3 | H2CBr | 13.44 | 144 | 127 |
| 50 | C sp3 | H2CJ | 18.58 | 39 | 35 |
| 51 | C sp3 | H2CSi | 9.66 | 345 | 154 |
| 52 | C sp3 | H2N2 | 17.9 | 2 | 2 |
| 53 | C sp3 | H2NO | 18.9 | 1 | 1 |
| 54 | C sp3 | H2NS | 17.11 | 1 | 1 |
| 55 | C sp3 | H2O2 | 16.37 | 19 | 18 |
| 56 | C sp3 | H2OCl | 16.45 | 8 | 7 |
| 57 | C sp3 | H2OBr | 20.6 | 7 | 7 |
| 58 | C sp3 | H2S2 | 16.43 | 10 | 5 |
| 59 | C sp3 | H2SCl | 16.52 | 4 | 4 |
| 60 | C sp3 | H2SJ | 21.65 | 2 | 2 |
| 61 | C sp3 | H2SiCl | 15.47 | 6 | 5 |
| 62 | C sp3 | H2SiBr | 18.54 | 4 | 3 |
| 63 | C sp3 | H2Si2 | 14.42 | 5 | 3 |
| 64 | C sp3 | HBC2 | -17.46 | 10 | 7 |
| 65 | C sp3 | HC3 | 3.52 | 1516 | 1044 |
| 66 | C sp3 | HC2N | 9.99 | 135 | 114 |
| 67 | C sp3 | HC2N(+) | 17.27 | 13 | 13 |
| 68 | C sp3 | HC2O | 9.55 | 561 | 462 |
| 69 | C sp3 | HC2P | 11.84 | 23 | 21 |
| 70 | C sp3 | HC2S | 9.55 | 75 | 53 |
| 71 | C sp3 | HC2F | 8.42 | 2 | 2 |
| 72 | C sp3 | HC2Cl | 9.39 | 84 | 74 |
| 73 | C sp3 | HC2Br | 12.42 | 80 | 70 |
| 74 | C sp3 | HC2J | 17.84 | 7 | 7 |
| 75 | C sp3 | HC2Si | 8.64 | 29 | 15 |
| 76 | C sp3 | HCN2(+) | 31.68 | 1 | 1 |
| 77 | C sp3 | HCNCl(+) | 23.09 | 2 | 2 |
| 78 | C sp3 | HCO2 | 15.36 | 53 | 45 |
| 79 | C sp3 | HCOF | 11.6 | 2 | 2 |
| 80 | C sp3 | HCOCl | 15.53 | 14 | 9 |
| 81 | C sp3 | HCOBr | 20.2 | 1 | 1 |
| 82 | C sp3 | HCS2 | 15.5 | 11 | 11 |
| 83 | C sp3 | HCSCl | 14.69 | 1 | 1 |
| 84 | C sp3 | HCF2 | 5.59 | 29 | 19 |
| 85 | C sp3 | HCFCl | 10.61 | 7 | 6 |
| 86 | C sp3 | HCFBr | 13.45 | 1 | 1 |
| 87 | C sp3 | HCCl2 | 15.36 | 33 | 32 |
| 88 | C sp3 | HCClBr | 18.18 | 5 | 5 |
| 89 | C sp3 | HCClJ | 22.97 | 2 | 2 |
| 90 | C sp3 | HCBr2 | 20.98 | 13 | 12 |
| 91 | C sp3 | HCBrJ | 25.95 | 1 | 1 |
| 92 | C sp3 | HCJ2 | 31.39 | 2 | 2 |
| 93 | C sp3 | HNO2 | 21.67 | 2 | 2 |
| 94 | C sp3 | HO3 | 21.51 | 9 | 9 |
| 95 | C sp3 | HOF2 | 11.17 | 1 | 1 |
| 96 | C sp3 | HOCl2 | 21.99 | 1 | 1 |
| 97 | C sp3 | HS3 | 22.99 | 2 | 2 |
| 98 | C sp3 | HSiCl2 | 20.41 | 5 | 4 |
| 99 | C sp3 | C4 | 2.47 | 299 | 251 |
| 100 | C sp3 | C3N | 8.92 | 25 | 21 |
| 101 | C sp3 | C3N(+) | 16.1 | 2 | 2 |
| 102 | C sp3 | C3O | 8.42 | 125 | 113 |
| 103 | C sp3 | C3S | 8.86 | 21 | 14 |
| 104 | C sp3 | C3P | 11.38 | 1 | 1 |
| 105 | C sp3 | C3F | 3.41 | 5 | 4 |
| 106 | C sp3 | C3Cl | 8.47 | 7 | 7 |
| 107 | C sp3 | C3Br | 11.46 | 7 | 7 |
| 108 | C sp3 | C3J | 16.82 | 3 | 3 |
| 109 | C sp3 | C3Si | 8.05 | 1 | 1 |
| 110 | C sp3 | C2NCl(+) | 22.78 | 1 | 1 |
| 111 | C sp3 | C2O2 | 14.18 | 15 | 15 |
| 112 | C sp3 | C2OCl | 14.76 | 4 | 4 |
| 113 | C sp3 | C2OS | 14 | 1 | 1 |
| 114 | C sp3 | C2OP | 17.43 | 3 | 3 |
| 115 | C sp3 | C2S2 | 14.73 | 14 | 14 |
| 116 | C sp3 | C2Si2 | 10.98 | 1 | 1 |
| 117 | C sp3 | C2F2 | 5.01 | 145 | 40 |
| 118 | C sp3 | C2FCl | 9.6 | 3 | 3 |
| 119 | C sp3 | C2Cl2 | 14.26 | 29 | 26 |
| 120 | C sp3 | C2ClBr | 17.66 | 3 | 3 |
| 121 | C sp3 | C2Br2 | 20.24 | 6 | 6 |
| 122 | C sp3 | C2J2 | 30.57 | 1 | 1 |
| 123 | C sp3 | CNF2 | 11.26 | 8 | 3 |
| 124 | C sp3 | CNF2(+) | 19.26 | 2 | 1 |
| 125 | C sp3 | CO3 | 19.63 | 7 | 7 |
| 126 | C sp3 | CO2Si | 17.49 | 1 | 1 |
| 127 | C sp3 | COF2 | 11.48 | 9 | 8 |
| 128 | C sp3 | COFCl | 16.44 | 1 | 1 |
| 129 | C sp3 | CS3 | 25.53 | 2 | 2 |
| 130 | C sp3 | CSF2 | 10.98 | 4 | 3 |
| 131 | C sp3 | CSCl2 | 22.95 | 1 | 1 |
| 132 | C sp3 | CSiBr2 | 32.18 | 1 | 1 |
| 133 | C sp3 | CF3 | 5.98 | 98 | 75 |
| 134 | C sp3 | CF2Cl | 10.67 | 16 | 14 |
| 135 | C sp3 | CF2Br | 13.41 | 6 | 5 |
| 136 | C sp3 | CF2J | 18.51 | 4 | 3 |
| 137 | C sp3 | CPF2(-) | 8.9 | 6 | 2 |
| 138 | C sp3 | CFCl2 | 15.39 | 8 | 6 |
| 139 | C sp3 | CCl3 | 20.42 | 34 | 31 |
| 140 | C sp3 | CCl2Br | 23.23 | 3 | 3 |
| 141 | C sp3 | CBr3 | 29.63 | 4 | 3 |
| 142 | C sp3 | N2F2(+) | 32.23 | 1 | 1 |
| 143 | C sp3 | O4 | 25.69 | 3 | 3 |
| 144 | C sp3 | OSCl2 | 28.62 | 3 | 3 |
| 145 | C sp3 | OF3 | 11.23 | 7 | 7 |
| 146 | C sp3 | OF2Cl | 16.36 | 1 | 1 |
| 147 | C sp3 | OCl3 | 26.18 | 5 | 5 |
| 148 | C sp3 | SF3 | 11.78 | 134 | 72 |
| 149 | C sp3 | SCl3 | 28.7 | 1 | 1 |
| 150 | C sp3 | SiCl3 | 25.66 | 1 | 1 |
| 151 | C(-) sp3 | HC2 | 8.26 | 2 | 2 |
| 152 | C(-) sp3 | C3 | 24.54 | 5 | 5 |
| 153 | C sp2 | H2=C | 5.49 | 497 | 428 |
| 154 | C sp2 | HC=C | 4.53 | 1415 | 860 |
| 155 | C sp2 | HC=N | 8.09 | 22 | 21 |
| 156 | C sp2 | HC=N(+) | 16.04 | 1 | 1 |
| 157 | C sp2 | H=CN | 9.75 | 238 | 132 |
| 158 | C sp2 | H=CN(+) | 17.95 | 3 | 3 |
| 159 | C sp2 | H=CN(-) | -7.22 | 4 | 4 |
| 160 | C sp2 | HC=O | 6.22 | 99 | 97 |
| 161 | C sp2 | H=CO | 3.36 | 131 | 120 |
| 162 | C sp2 | H=CP | 14.75 | 25 | 25 |
| 163 | C sp2 | H=CS | 10.03 | 79 | 72 |
| 164 | C sp2 | H=CF | 5.13 | 1 | 1 |
| 165 | C sp2 | H=CCl | 10.29 | 26 | 23 |
| 166 | C sp2 | H=CBr | 13.14 | 15 | 13 |
| 167 | C sp2 | H=CJ | 18.02 | 2 | 2 |
| 168 | C sp2 | H=CSi | 9.49 | 21 | 15 |
| 169 | C sp2 | HN=N | 13.1 | 7 | 7 |
| 170 | C sp2 | HN=N(-) | 5.23 | 2 | 2 |
| 171 | C sp2 | HN=O | 11.36 | 11 | 11 |
| 172 | C sp2 | H=NO | 6.76 | 3 | 3 |
| 173 | C sp2 | H=NS | 13.17 | 2 | 2 |
| 174 | C sp2 | H=NS(+) | -1.5 | 11 | 11 |
| 175 | C sp2 | HN=S | 20.09 | 1 | 1 |
| 176 | C sp2 | HO=O | 5.11 | 25 | 23 |
| 177 | C sp2 | HO=O(-) | -0.62 | 4 | 4 |
| 178 | C sp2 | H=OS | 12.42 | 2 | 2 |
| 179 | C sp2 | C2=C | 3.53 | 377 | 295 |
| 180 | C sp2 | C2=N | 6.82 | 41 | 34 |
| 181 | C sp2 | C2=N(+) | 25.75 | 5 | 5 |
| 182 | C sp2 | C2=O | 4.9 | 341 | 330 |
| 183 | C sp2 | C2=O(-) | 0 | 4 | 2 |
| 184 | C sp2 | C2=S | 11.71 | 1 | 1 |
| 185 | C sp2 | C=CN | 8.66 | 44 | 33 |
| 186 | C sp2 | C=CN(+) | 16.87 | 3 | 3 |
| 187 | C sp2 | C=CO | 2.4 | 94 | 88 |
| 188 | C sp2 | C=CS | 9.32 | 40 | 39 |
| 189 | C sp2 | C=CF | 4.43 | 6 | 4 |
| 190 | C sp2 | C=CCl | 9.45 | 51 | 39 |
| 191 | C sp2 | C=CBr | 11.94 | 15 | 15 |
| 192 | C sp2 | C=CJ | 18.24 | 1 | 1 |
| 193 | C sp2 | CN=N | 12.41 | 3 | 3 |
| 194 | C sp2 | CN=N(+) | -2.61 | 4 | 4 |
| 195 | C sp2 | CN=O | 10.15 | 76 | 71 |
| 196 | C sp2 | C=NO | 5.46 | 11 | 11 |
| 197 | C sp2 | CN=O(+) | 22.4 | 3 | 3 |
| 198 | C sp2 | =CNO(+) | 18.51 | 1 | 1 |
| 199 | C sp2 | C=NS | 12.19 | 3 | 3 |
| 200 | C sp2 | CO=O | 3.91 | 1115 | 877 |
| 201 | C sp2 | CO=O(-) | -2.03 | 50 | 50 |
| 202 | C sp2 | C=OP | 13.82 | 1 | 1 |
| 203 | C sp2 | C=OS | 10.82 | 8 | 8 |
| 204 | C sp2 | C=OF | 4.46 | 2 | 2 |
| 205 | C sp2 | C=OCl | 11.16 | 64 | 55 |
| 206 | C sp2 | C=OBr | 14.11 | 4 | 4 |
| 207 | C sp2 | C=OJ | 20.45 | 1 | 1 |
| 208 | C sp2 | CS=S | 19.39 | 1 | 1 |
| 209 | C sp2 | =CO2 | 1.21 | 2 | 2 |
| 210 | C sp2 | =COS | 8 | 3 | 3 |
| 211 | C sp2 | =COCl | 7.75 | 1 | 1 |
| 212 | C sp2 | =COBr | 10.45 | 1 | 1 |
| 213 | C sp2 | =COJ | 15.61 | 1 | 1 |
| 214 | C sp2 | =CSCl | 14.74 | 6 | 4 |
| 215 | C sp2 | =CSBr | 17.68 | 4 | 3 |
| 216 | C sp2 | =CSJ | 22.25 | 1 | 1 |
| 217 | C sp2 | =CSiBr | 17.13 | 1 | 1 |
| 218 | C sp2 | =CF2 | 5.09 | 7 | 7 |
| 219 | C sp2 | =CFCl | 10.2 | 3 | 2 |
| 220 | C sp2 | =CCl2 | 15.3 | 15 | 13 |
| 221 | C sp2 | =CClJ | 22.87 | 1 | 1 |
| 222 | C sp2 | =CBr2 | 20.76 | 7 | 7 |
| 223 | C sp2 | =CBrJ | 25.82 | 1 | 1 |
| 224 | C sp2 | =CJ2 | 30.75 | 1 | 1 |
| 225 | C sp2 | N2=N | 16.88 | 2 | 2 |
| 226 | C sp2 | N2=O | 14.77 | 10 | 10 |
| 227 | C sp2 | N2=S | 21.5 | 2 | 2 |
| 228 | C sp2 | NO=O | 9.3 | 19 | 16 |
| 229 | C sp2 | NO=S | 18.4 | 1 | 1 |
| 230 | C sp2 | N=OS | 17.32 | 2 | 2 |
| 231 | C sp2 | N=OCl | 16.29 | 1 | 1 |
| 232 | C sp2 | =NOCl | 10.4 | 1 | 1 |
| 233 | C sp2 | =NS2 | 20.87 | 3 | 3 |
| 234 | C sp2 | =NSCl | 17.86 | 1 | 1 |
| 235 | C sp2 | =NSBr | 21.65 | 1 | 1 |
| 236 | C sp2 | O2=O | 2.9 | 21 | 20 |
| 237 | C sp2 | O=OS | -14.19 | 1 | 1 |
| 238 | C sp2 | O=OCl | 10 | 13 | 12 |
| 239 | C sp2 | =OS2 | 17.71 | 1 | 1 |
| 240 | C sp2 | OS=S | 18.21 | 8 | 8 |
| 241 | C sp2 | S2=S | 26.78 | 2 | 2 |
| 242 | C sp2 | =OSCl | 17.33 | 1 | 1 |
| 243 | C aromatic | H:C2 | 4.42 | 6519 | 1357 |
| 244 | C aromatic | H:C:N | 6.45 | 139 | 92 |
| 245 | C aromatic | H:C:N(+) | 3.24 | 62 | 33 |
| 246 | C aromatic | H:N2 | 7.84 | 3 | 3 |
| 247 | C aromatic | B:C2 | -16.99 | 46 | 37 |
| 248 | C aromatic | :C3 | 4.56 | 251 | 119 |
| 249 | C aromatic | C:C2 | 3.53 | 1300 | 909 |
| 250 | C aromatic | C:C:N | 5.73 | 52 | 43 |
| 251 | C aromatic | C:C:N(+) | 2.09 | 6 | 5 |
| 252 | C aromatic | :C2N | 9.79 | 158 | 143 |
| 253 | C aromatic | :C2N(+) | 18.25 | 40 | 35 |
| 254 | C aromatic | :C2:N | 6.2 | 11 | 11 |
| 255 | C aromatic | :C2O | 2.8 | 359 | 287 |
| 256 | C aromatic | :C2P | 11.21 | 35 | 34 |
| 257 | C aromatic | :C2S | 9.77 | 43 | 40 |
| 258 | C aromatic | :C2F | 4.32 | 119 | 64 |
| 259 | C aromatic | :C2Cl | 9.24 | 123 | 99 |
| 260 | C aromatic | :C2Br | 12.01 | 60 | 54 |
| 261 | C aromatic | :C2J | 16.99 | 19 | 18 |
| 262 | C aromatic | :C2Si | 8.57 | 79 | 52 |
| 263 | C aromatic | :CN:N | 11.15 | 3 | 2 |
| 264 | C aromatic | C:N2 | 8.01 | 4 | 2 |
| 265 | C aromatic | :C:NO | 5.39 | 4 | 4 |
| 266 | C aromatic | :C:NF | 6.07 | 5 | 4 |
| 267 | C aromatic | :C:NCl | 11.5 | 3 | 3 |
| 268 | C aromatic | :C:NBr | 13.99 | 2 | 2 |
| 269 | C aromatic | :C:NJ | 20.37 | 1 | 1 |
| 270 | C aromatic | N:N2 | 15.39 | 5 | 2 |
| 271 | C aromatic | :N2Cl | 12.28 | 1 | 1 |
| 272 | C(+) aromatic | H:N2 | -10.11 | 95 | 95 |
| 273 | C(+) aromatic | C:N2 | -64.74 | 3 | 3 |
| 274 | C(+) aromatic | :N3 | -8.28 | 5 | 5 |
| 275 | C sp | B#N(-) | -14.24 | 20 | 5 |
| 276 | C sp | H#C | 4.41 | 84 | 77 |
| 277 | C sp | =C2 | 4.9 | 9 | 9 |
| 278 | C sp | C#C | 3.88 | 200 | 138 |
| 279 | C sp | C#N | 5.49 | 149 | 132 |
| 280 | C sp | C#N(-) | -3.13 | 15 | 5 |
| 281 | C sp | =C=O | 5.84 | 4 | 3 |
| 282 | C sp | #CO | 3.2 | 6 | 6 |
| 283 | C sp | #CS | 9.65 | 1 | 1 |
| 284 | C sp | #CSi | 8.08 | 6 | 3 |
| 285 | C sp | #CCl | 10.37 | 3 | 3 |
| 286 | C sp | #CBr | 12.31 | 4 | 4 |
| 287 | C sp | #CJ | 17.16 | 6 | 6 |
| 288 | C sp | =N2 | 11.03 | 1 | 1 |
| 289 | C sp | N#N | 10.62 | 3 | 3 |
| 290 | C sp | N#N(-) | 1.34 | 26 | 13 |
| 291 | C sp | =N=O | 8.24 | 18 | 14 |
| 292 | C sp | #NO | 5.66 | 1 | 1 |
| 293 | C sp | #NP | -2.29 | 1 | 1 |
| 294 | C sp | =N=S | 15.8 | 34 | 20 |
| 295 | C sp | =N=S(-) | 7.85 | 4 | 4 |
| 296 | C sp | #NS | 11.5 | 12 | 12 |
| 297 | N sp3 | H2B | -12.94 | 1 | 1 |
| 298 | N sp3 | H2C | -2 | 148 | 133 |
| 299 | N sp3 | H2C(pi) | -1.3 | 77 | 69 |
| 300 | N sp3 | H2N | -5.01 | 13 | 13 |
| 301 | N sp3 | H2Si | 1.97 | 4 | 4 |
| 302 | N sp3 | HC2 | -9.63 | 110 | 108 |
| 303 | N sp3 | HBC | -20.05 | 18 | 11 |
| 304 | N sp3 | HBC(pi) | -18.67 | 6 | 5 |
| 305 | N sp3 | HC2(pi) | -8.63 | 54 | 53 |
| 306 | N sp3 | HC2(2pi) | -7.37 | 37 | 34 |
| 307 | N sp3 | HCN | -2.94 | 9 | 5 |
| 308 | N sp3 | HCN(pi) | -1.31 | 2 | 2 |
| 309 | N sp3 | HCN(+)(pi) | 4.48 | 2 | 2 |
| 310 | N sp3 | HCN(2pi) | -3.61 | 3 | 3 |
| 311 | N sp3 | HCO | -2.67 | 2 | 2 |
| 312 | N sp3 | HCP | 0.72 | 3 | 3 |
| 313 | N sp3 | HCSi | -5.5 | 6 | 6 |
| 314 | N sp3 | HCSi(pi) | -4.28 | 1 | 1 |
| 315 | N sp3 | HNSi | -8.36 | 34 | 19 |
| 316 | N sp3 | HSi2 | -1.34 | 19 | 15 |
| 317 | N sp3 | B2C | -38.6 | 12 | 4 |
| 318 | N sp3 | BC2 | -27.51 | 16 | 11 |
| 319 | N sp3 | BC2(pi) | -26.43 | 2 | 1 |
| 320 | N sp3 | C3 | -16.75 | 123 | 110 |
| 321 | N sp3 | C3(pi) | -15.83 | 67 | 61 |
| 322 | N sp3 | C3(2pi) | -14.97 | 22 | 22 |
| 323 | N sp3 | C3(3pi) | -15.13 | 3 | 3 |
| 324 | N sp3 | C2N | -0.73 | 45 | 30 |
| 325 | N sp3 | C2N(pi) | -0.19 | 14 | 14 |
| 326 | N sp3 | C2N(2pi) | -10.64 | 4 | 4 |
| 327 | N sp3 | C2N(3pi) | -9.23 | 2 | 2 |
| 328 | N sp3 | C2N(+)(pi) | -2.99 | 2 | 2 |
| 329 | N sp3 | C2N(+)(2pi) | -1.57 | 2 | 2 |
| 330 | N sp3 | C2N(+)(3pi) | -40.57 | 5 | 5 |
| 331 | N sp3 | C2O | -10.11 | 4 | 4 |
| 332 | N sp3 | C2P | -6.55 | 86 | 54 |
| 333 | N sp3 | C2Si | -12.89 | 27 | 12 |
| 334 | N sp3 | CCl2(pi) | 11.05 | 1 | 1 |
| 335 | N sp2 | H=C | 1.03 | 8 | 8 |
| 336 | N sp2 | C=C | -6.59 | 63 | 58 |
| 337 | N sp2 | C=N | -2.23 | 11 | 6 |
| 338 | N sp2 | C=N(+) | 0.41 | 5 | 5 |
| 339 | N sp2 | =CN | -0.2 | 19 | 13 |
| 340 | N sp2 | =CN(-) | 13.22 | 2 | 2 |
| 341 | N sp2 | =CO | -2.21 | 34 | 33 |
| 342 | N sp2 | =CP | 2.65 | 1 | 1 |
| 343 | N sp2 | =CS | 4.72 | 3 | 2 |
| 344 | N sp2 | =CSi | -2.01 | 26 | 12 |
| 345 | N sp2 | N=N | 3.04 | 1 | 1 |
| 346 | N sp2 | N=O | -4.93 | 12 | 12 |
| 347 | N sp2 | O=O | 3.41 | 18 | 15 |
| 348 | N sp2 | P=P | 4.02 | 9 | 3 |
| 349 | N(+) sp3 | H3C | -0.39 | 13 | 13 |
| 350 | N(+) sp3 | H2C2 | -15.27 | 4 | 4 |
| 351 | N(+) sp3 | HC3 | -30.15 | 8 | 8 |
| 352 | N(+) sp3 | C4 | -47.94 | 46 | 46 |
| 353 | N(+) sp2 | HC=C | 12.52 | 4 | 4 |
| 354 | N(+) sp2 | C2=C | -5.91 | 11 | 11 |
| 355 | N(+) sp2 | C=CN | 0 | 5 | 5 |
| 356 | N(+) sp2 | C=NO(-) | -4.48 | 2 | 2 |
| 357 | N(+) sp2 | CO=O(-) | -7.16 | 75 | 65 |
| 358 | N(+) sp2 | NO=O(-) | 0 | 6 | 6 |
| 359 | N(+) sp2 | O2=O(-) | 0.2 | 27 | 20 |
| 360 | N aromatic | H2:C(+) | 0 | 5 | 5 |
| 361 | N aromatic | HC:C(+) | 10.05 | 1 | 1 |
| 362 | N aromatic | :C2 | -1.94 | 120 | 105 |
| 363 | N aromatic | C2:C(+) | 1.26 | 205 | 103 |
| 364 | N aromatic | :C:N | 0.2 | 6 | 3 |
| 365 | N(+) aromatic | C:C2 | -1.86 | 33 | 33 |
| 366 | N(+) aromatic | :C2O(-) | 8.85 | 1 | 1 |
| 367 | N(+) sp | C#C(-) | -7.99 | 3 | 3 |
| 368 | N(+) sp | =C=N(-) | -3.91 | 1 | 1 |
| 369 | N(+) sp | =N2(-) | 2.99 | 3 | 3 |
| 370 | N(-) | C2 | 4.69 | 15 | 15 |
| 371 | N(-) | CN | -12.52 | 2 | 2 |
| 372 | N(-) | S2 | 1.69 | 69 | 69 |
| 373 | O | HB | -17.09 | 3 | 3 |
| 374 | O | B2 | -35.49 | 6 | 6 |
| 375 | O | HC | -3.5 | 602 | 527 |
| 376 | O | HC(pi) | 3.39 | 266 | 250 |
| 377 | O | HN | 2.35 | 4 | 4 |
| 378 | O | HN(pi) | 4.33 | 14 | 14 |
| 379 | O | HO | 2.75 | 15 | 15 |
| 380 | O | HS | 7.17 | 5 | 4 |
| 381 | O | HP | 5.14 | 26 | 23 |
| 382 | O | HSi | 0.8 | 7 | 7 |
| 383 | O | BC | -23.16 | 165 | 75 |
| 384 | O | BC(pi) | -11.65 | 2 | 1 |
| 385 | O | BC(-)(pi) | -31.4 | 8 | 4 |
| 386 | O | C2 | -10.27 | 617 | 420 |
| 387 | O | C2(pi) | -3.51 | 1209 | 958 |
| 388 | O | C2(2pi) | 3.23 | 137 | 135 |
| 389 | O | CN | -4.7 | 2 | 2 |
| 390 | O | CN(pi) | -2.22 | 31 | 28 |
| 391 | O | CN(+)(pi) | 2.51 | 24 | 17 |
| 392 | O | CN(2pi) | 3.03 | 5 | 5 |
| 393 | O | CO | -3.92 | 31 | 23 |
| 394 | O | CO(pi) | 3.65 | 2 | 2 |
| 395 | O | CP | -1.46 | 471 | 249 |
| 396 | O | CP(pi) | 4.87 | 50 | 30 |
| 397 | O | CS | -0.98 | 48 | 37 |
| 398 | O | CSi | -6.31 | 244 | 103 |
| 399 | O | CSi(pi) | 0.28 | 29 | 19 |
| 400 | O | CCl | 2.14 | 1 | 1 |
| 401 | O | N2(2pi) | 3.14 | 1 | 1 |
| 402 | O | P2 | 7.2 | 23 | 19 |
| 403 | O | Si2 | -2.39 | 116 | 35 |
| 404 | P3 | H2C | 2.85 | 17 | 17 |
| 405 | P3 | HC2 | -6.24 | 3 | 3 |
| 406 | P3 | C3 | -15.17 | 18 | 18 |
| 407 | P3 | C2O | -10.92 | 10 | 10 |
| 408 | P3 | C2S | -3.08 | 3 | 3 |
| 409 | P3 | C2Cl | -6.82 | 16 | 16 |
| 410 | P3 | CO2 | -6.82 | 15 | 15 |
| 411 | P3 | COCl | -2.2 | 6 | 6 |
| 412 | P3 | CS2 | 17.67 | 1 | 1 |
| 413 | P3 | CCl2 | 12.05 | 8 | 8 |
| 414 | P3 | N3 | -4.26 | 1 | 1 |
| 415 | P3 | N2O | -2.29 | 3 | 3 |
| 416 | P3 | NO2 | -1.46 | 3 | 3 |
| 417 | P3 | O3 | -1.41 | 26 | 26 |
| 418 | P3 | O2Cl | 6.11 | 1 | 1 |
| 419 | P3 | OCl2 | 16.38 | 1 | 1 |
| 420 | P3 | S3 | 21.45 | 4 | 4 |
| 421 | P4 | HC2=O | -7.52 | 2 | 2 |
| 422 | P4 | HO2=O | 2.18 | 17 | 17 |
| 423 | P4 | HO2=S | 8.79 | 3 | 3 |
| 424 | P4 | C3=O | -17.18 | 3 | 3 |
| 425 | P4 | C3=S | -8.85 | 3 | 3 |
| 426 | P4 | C2O=O | -12.11 | 10 | 10 |
| 427 | P4 | C2O=O(-) | -15.97 | 1 | 1 |
| 428 | P4 | C2=OS | -4.17 | 1 | 1 |
| 429 | P4 | C2O=S | -4.41 | 1 | 1 |
| 430 | P4 | C2S=S | -0.38 | 1 | 1 |
| 431 | P4 | C2=SCl | 5.18 | 1 | 1 |
| 432 | P4 | CN2=O | -10.68 | 10 | 10 |
| 433 | P4 | CNO=O | 8.01 | 1 | 1 |
| 434 | P4 | CN=OF | -5.4 | 4 | 4 |
| 435 | P4 | CN=OCl | 0.56 | 5 | 5 |
| 436 | P4 | CO2=O | -7.79 | 42 | 42 |
| 437 | P4 | CO2=O(-) | -10.36 | 1 | 1 |
| 438 | P4 | CO2=S | 0.26 | 8 | 8 |
| 439 | P4 | C=OS2 | 8.61 | 2 | 2 |
| 440 | P4 | COS=S | 7.49 | 30 | 30 |
| 441 | P4 | C=OF2 | 0.52 | 5 | 5 |
| 442 | P4 | C=OCl2 | 11.1 | 9 | 9 |
| 443 | P4 | CS2=S | 16.66 | 6 | 3 |
| 444 | P4 | C=SCl2 | 19.41 | 5 | 5 |
| 445 | P4 | N3=O | -6.3 | 1 | 1 |
| 446 | P4 | N2O=O | -5 | 5 | 5 |
| 447 | P4 | N=NO2 | -3.25 | 6 | 2 |
| 448 | P4 | N2O=S | 3.2 | 2 | 2 |
| 449 | P4 | N2=OF | -0.37 | 1 | 1 |
| 450 | P4 | N=NS2 | 12.33 | 3 | 1 |
| 451 | P4 | NO2=O | -4.03 | 3 | 3 |
| 452 | P4 | NO2=S | 4.11 | 6 | 6 |
| 453 | P4 | NO=OF | 0.12 | 7 | 6 |
| 454 | P4 | NO=SF | 7.56 | 5 | 4 |
| 455 | P4 | N=OF2 | 4.05 | 1 | 1 |
| 456 | P4 | N=OFCl | 9.6 | 2 | 2 |
| 457 | P4 | N=OFBr | 12.55 | 1 | 1 |
| 458 | P4 | N=OCl2 | 14.9 | 1 | 1 |
| 459 | P4 | N=SFCl | 17.24 | 1 | 1 |
| 460 | P4 | N=SFBr | 20.83 | 1 | 1 |
| 461 | P4 | N=SCl2 | 22.78 | 1 | 1 |
| 462 | P4 | O3=O | -2.5 | 33 | 26 |
| 463 | P4 | O3=O(-) | -6.33 | 3 | 3 |
| 464 | P4 | O3=S | 5.03 | 16 | 14 |
| 465 | P4 | O2=OS | 15.08 | 4 | 4 |
| 466 | P4 | O2=OF | 1.56 | 16 | 12 |
| 467 | P4 | O2=OCl | 6.38 | 2 | 2 |
| 468 | P4 | O2S=S | 12.87 | 2 | 2 |
| 469 | P4 | O2=SF | 9.65 | 2 | 1 |
| 470 | P4 | O2=SCl | 14.28 | 3 | 3 |
| 471 | P4 | O=OF2 | 5.45 | 1 | 1 |
| 472 | P4 | O=OFCl | 10.51 | 7 | 6 |
| 473 | P4 | O=OFBr | 13.17 | 1 | 1 |
| 474 | P4 | O=OCl2 | 15.86 | 1 | 1 |
| 475 | P4 | O=SF2 | 12.58 | 1 | 1 |
| 476 | P4 | O=SFCl | 18.16 | 1 | 1 |
| 477 | P4 | O=SFBr | 21.4 | 1 | 1 |
| 478 | P4 | O=SCl2 | 23.03 | 1 | 1 |
| 479 | P(-) | C3F3 | -11.9 | 2 | 2 |
| 480 | P(-) | F6 | 1.32 | 6 | 6 |
| 481 | P(+) | C4 | -14.3 | 12 | 12 |
| 482 | S2 | HC | 2.74 | 78 | 58 |
| 483 | S2 | HC(pi) | 2.64 | 8 | 7 |
| 484 | S2 | HP | 5.84 | 27 | 27 |
| 485 | S2 | BC | -21.7 | 51 | 32 |
| 486 | S2 | BC(pi) | -21.88 | 3 | 3 |
| 487 | S2 | C2 | -4.08 | 157 | 98 |
| 488 | S2 | C2(pi) | -3.93 | 77 | 73 |
| 489 | S2 | C2(2pi) | -4.31 | 70 | 70 |
| 490 | S2 | CP | -1.63 | 34 | 18 |
| 491 | S2 | CS | 2.06 | 38 | 21 |
| 492 | S2 | CS(pi) | -12.06 | 2 | 1 |
| 493 | S2 | CCl | 6.16 | 5 | 5 |
| 494 | S2 | N2(2pi) | -5.14 | 1 | 1 |
| 495 | S2 | PCl | 0 | 4 | 4 |
| 496 | S2 | P2 | 0 | 6 | 3 |
| 497 | S2 | S2 | 8.87 | 6 | 5 |
| 498 | S4 | C2=O | -3.2 | 4 | 4 |
| 499 | S4 | C2=O2 | -3.24 | 12 | 12 |
| 500 | S4 | CN=O2(-) | -0.22 | 126 | 63 |
| 501 | S4 | CO=O2 | -1.48 | 11 | 11 |
| 502 | S4 | CO=O2(-) | -3.78 | 24 | 24 |
| 503 | S4 | C=OCl | 9.42 | 6 | 6 |
| 504 | S4 | C=OS | 3.69 | 4 | 4 |
| 505 | S4 | C=O2F | 4.69 | 8 | 8 |
| 506 | S4 | C=O2Cl | 8.91 | 8 | 8 |
| 507 | S4 | N=O2F(-) | 5.76 | 12 | 6 |
| 508 | S4 | N=O2Cl | 10.28 | 1 | 1 |
| 509 | S4 | O=OCl | 11.86 | 1 | 1 |
| 510 | S4 | O2=O | 1.31 | 7 | 7 |
| 511 | S4 | O2=O2 | 1.17 | 4 | 4 |
| 512 | S4 | O2=O2(-) | -2.26 | 16 | 16 |
| 513 | S4 | O=O2Cl | 11.45 | 2 | 2 |
| 514 | S4 | O=O2F | 5.93 | 1 | 1 |
| 515 | S(+) | C3 | -19.18 | 5 | 5 |
| 516 | Si | H3C | 6.42 | 8 | 7 |
| 517 | Si | H3Si | 12.32 | 19 | 8 |
| 518 | Si | H2C2 | 0.06 | 12 | 10 |
| 519 | Si | H2CN | 6.65 | 1 | 1 |
| 520 | Si | H2CCl | 10.82 | 1 | 1 |
| 521 | Si | H2Si2 | 12.04 | 18 | 7 |
| 522 | Si | HC3 | -6.7 | 14 | 14 |
| 523 | Si | HC2N | 0.57 | 5 | 4 |
| 524 | Si | HC2O | -0.27 | 11 | 7 |
| 525 | Si | HC2Cl | 3.98 | 4 | 4 |
| 526 | Si | HCN2 | 7.39 | 6 | 6 |
| 527 | Si | HCO2 | 5.89 | 18 | 9 |
| 528 | Si | HCOCl | 10.13 | 1 | 1 |
| 529 | Si | HN3 | 14.51 | 1 | 1 |
| 530 | Si | HSi3 | 12.05 | 3 | 3 |
| 531 | Si | C4 | -12.83 | 49 | 40 |
| 532 | Si | C3N | -6.05 | 42 | 32 |
| 533 | Si | C3O | -6.7 | 84 | 61 |
| 534 | Si | C3F | -7.57 | 5 | 5 |
| 535 | Si | C3Cl | -2.55 | 12 | 12 |
| 536 | Si | C3Br | 0.52 | 3 | 3 |
| 537 | Si | C3J | 6.46 | 2 | 2 |
| 538 | Si | C3Si | -6.69 | 6 | 3 |
| 539 | Si | C2N2 | 1.02 | 12 | 10 |
| 540 | Si | C2O2 | -0.54 | 100 | 39 |
| 541 | Si | C2Si2 | -0.39 | 3 | 2 |
| 542 | Si | C2SiCl | 3.56 | 2 | 1 |
| 543 | Si | C2F2 | -2.89 | 6 | 6 |
| 544 | Si | C2Cl2 | 8.03 | 13 | 13 |
| 545 | Si | C2Br2 | 14.34 | 1 | 1 |
| 546 | Si | C2J2 | 26 | 1 | 1 |
| 547 | Si | CN3 | 7.74 | 6 | 6 |
| 548 | Si | CN2Cl | 11.22 | 2 | 2 |
| 549 | Si | CO3 | 5.81 | 30 | 30 |
| 550 | Si | COCl2 | 14.59 | 4 | 4 |
| 551 | Si | CF3 | 2.56 | 3 | 3 |
| 552 | Si | CCl3 | 18.65 | 17 | 16 |
| 553 | Si | CBr3 | 27.76 | 1 | 1 |
| 554 | Si | NO3 | 12.84 | 6 | 4 |
| 555 | Si | N2O2 | 4.42 | 1 | 1 |
| 556 | Si | N3O | 0.43 | 1 | 1 |
| 557 | Si | N4 | 14.64 | 4 | 4 |
| 558 | Si | O4 | 12.5 | 15 | 15 |
| 559 | Si | O3Cl | 16.78 | 1 | 1 |
| 560 | Si | OCl3 | 25.14 | 2 | 2 |
| 561 | Chloride |  | -1 | 7 | 7 |
| 562 | Bromide |  | 3.11 | 3 | 3 |
| A | Based on | Valid groups | 382 |  | 5988 |
| B | Goodness of fit | R2 | 0.9997 |  | 5763 |
| C | Deviation | Average | 0.29 |  | 5763 |
| D | Deviation | Standard | 0.38 |  | 5763 |
| E | K-fold cv | K | 10 |  | 5572 |
| F | Goodness of fit | Q2 | 0.9997 |  | 5572 |
| G | Deviation | Average (cv) | 0.31 |  | 5572 |
| H | Deviation | Standard (cv) | 0.41 |  | 5572 |
