# Supplementary material for: Revision and Extension of a Generally Applicable Group-Additivity Method for the Calculation of the Refractivity and Polarizability of Organic Molecules
Source: Preprints.org preprint supplement (doi:10.20944/preprints202208.0543.v1), 2022-08-31
Supplement: Supplementary file 8 [file Table 3.doc]

| **Atom type Neighbors** | **B(-) F4** | **C sp3 H3C** | **C sp3 H3N** | **C sp3 H2C2** | **C sp3 H2CN** | **C sp2 H=CN** | **C(+) aromatic HN2** | **N aromatic C2:C(+)** | **Sum** |
| --- | --- | --- | --- | --- | --- | --- | --- | --- | --- |
| **Contribution** | -2.41 | 5.7 | 12.24 | 4.63 | 11.13 | 9.75 | -10.11 | 1.26 |  |
| **n Groups** | 1 | 1 | 1 | 2 | 1 | 2 | 1 | 2 |  |
| **n x Contribution** | -2.41 | 5.7 | 12.24 | 9.26 | 11.13 | 19.5 | -10.11 | 2.52 | 47.83 |
