# Supplementary material for: Revision and Extension of a Generally Applicable Group-Additivity Method for the Calculation of the Refractivity and Polarizability of Organic Molecules
Source: Preprints.org preprint supplement (doi:10.20944/preprints202208.0543.v1), 2022-08-31
Supplement: Supplementary file 9 [file Table 3.xls]

## Sheet: Tabelle1
Atom type Neighbors	B(-) F4	C sp3 H3C	C sp3 H3N	C sp3 H2C2	C sp3 H2CN	C sp2 H=CN	C(+) aromatic HN2	N aromatic C2:C(+)	Sum
Contribution	-2.41	5.7	12.24	4.63	11.13	9.75	-10.11	1.26
n Groups	1	1	1	2	1	2	1	2
n x Contribution	-2.41	5.7	12.24	9.26	11.13	19.5	-10.11	2.52	47.83
